# Supplementary material for: Determinants of Household Solid Waste Generation and Composition in Homs City, Syria
Source: PubMed Central journal article supplement (PMC7714613; doi:10.1155/2020/7460356), 2020-11-26
Supplement: 7460356.f1.pdf [file 7460356.f1.pdf]

| id | area  | size | gender | educ                         | Income            | Waste generation per capita |
|----|-------|------|--------|------------------------------|-------------------|-----------------------------|
| 1  | Zone1 | 2    | f      | College / Institute          | 50.001-100.000    | 0.5420                      |
| 2  | Zone1 | 2    | m      | College / Institute          | 50.001-100.000    | 0.5475                      |
| 3  | Zone1 | 2    | f      | College / Institute          | 50.001-100.000    | 0.6028                      |
| 4  | Zone1 | 2    | f      | Postgraduate                 | 50.001-100.000    | 0.5150                      |
| 5  | Zone1 | 3    | m      | College / Institute          | 50.001-100.000    | 0.6024                      |
| 6  | Zone1 | 3    | f      | College / Institute          | 50.001-100.000    | 0.6036                      |
| 7  | Zone1 | 3    | m      | High school                  | 50.001-100.000    | 0.6012                      |
| 8  | Zone1 | 3    | f      | College / Institute          | 50.001-100.000    | 0.5964                      |
| 9  | Zone1 | 3    | f      | College / Institute          | 50.001-100.000    | 0.5917                      |
| 10 | Zone1 | 3    | f      | College / Institute          | 50.001-100.000    | 0.5952                      |
| 11 | Zone1 | 3    | f      | High school                  | Less than 50.000  | 0.6095                      |
| 12 | Zone1 | 4    | f      | High school                  | 100.001-150.000   | 0.6554                      |
| 13 | Zone1 | 4    | m      | High school                  | 50.001-100.000    | 0.6491                      |
| 14 | Zone1 | 4    | f      | High school                  | 50.001-100.000    | 0.6473                      |
| 15 | Zone1 | 4    | f      | High school                  | 50.001-100.000    | 0.6431                      |
| 16 | Zone1 | 4    | m      | High school                  | 50.001-100.000    | 0.6411                      |
| 17 | Zone1 | 4    | f      | High school                  | 100.001-150.000   | 0.6500                      |
| 18 | Zone1 | 5    | f      | High school                  | 100.001-150.000   | 0.6912                      |
| 19 | Zone1 | 5    | m      | Elementary school            | 150.001-200.000   | 0.7050                      |
| 20 | Zone1 | 5    | f      | Elementary school            | 150.001-200.000   | 0.7017                      |
| 21 | Zone1 | 5    | f      | High school                  | 100.001-150.000   | 0.6950                      |
| 22 | Zone1 | 5    | m      | Elementary school            | 150.001-200.000   | 0.7034                      |
| 23 | Zone1 | 5    | f      | High school                  | 100.001-150.000   | 0.6971                      |
| 24 | Zone1 | 5    | f      | Elementary school            | 150.001-200.000   | 0.6991                      |
| 25 | Zone1 | 5    | f      | Junior high or middle school | 150.001-200.000   | 0.7093                      |
| 26 | Zone1 | 5    | m      | Junior high or middle school | More than 200.000 | 0.6983                      |
| 27 | Zone1 | 5    | f      | Elementary school            | 150.001-200.000   | 0.7036                      |
| 28 | Zone1 | 5    | m      | Junior high or middle school | 150.001-200.000   | 0.7011                      |
| 29 | Zone1 | 5    | f      | Junior high or middle school | 100.001-150.000   | 0.6936                      |
| 30 | Zone1 | 6    | m      | Junior high or middle school | 100.001-150.000   | 0.6780                      |
| 31 | Zone1 | 6    | m      | High school                  | 100.001-150.000   | 0.6606                      |
| 32 | Zone1 | 6    | f      | High school                  | 100.001-150.000   | 0.6794                      |
| 33 | Zone1 | 6    | m      | High school                  | 100.001-150.000   | 0.6692                      |
| 34 | Zone1 | 6    | f      | Junior high or middle school | 100.001-150.000   | 0.6926                      |
| 35 | Zone1 | 6    | m      | Junior high or middle school | 100.001-150.000   | 0.7039                      |
| 36 | Zone1 | 6    | f      | High school                  | Less than 50.000  | 0.6501                      |
| 37 | Zone1 | 6    | m      | High school                  | Less than 50.000  | 0.6546                      |
| 38 | Zone1 | 6    | f      | Junior high or middle school | 100.001-150.000   | 0.6870                      |
| 39 | Zone1 | 6    | m      | Junior high or middle school | 100.001-150.000   | 0.6982                      |
| 40 | Zone1 | 6    | f      | High school                  | 100.001-150.000   | 0.6750                      |
| 41 | Zone1 | 6    | f      | Junior high or middle school | 100.001-150.000   | 0.6908                      |
| 42 | Zone1 | 6    | m      | High school                  | Less than 50.000  | 0.6492                      |
| 43 | Zone1 | 6    | f      | Junior high or middle school | 100.001-150.000   | 0.6802                      |
| 44 | Zone1 | 6    | m      | Junior high or middle school | 100.001-150.000   | 0.6860                      |
| 45 | Zone1 | 6    | m      | High school                  | Less than 50.000  | 0.6268                      |
| 46 | Zone1 | 7    | f      | College / Institute          | 50.001-100.000    | 0.5444                      |
| 47 | Zone1 | 7    | f      | College / Institute          | 50.001-100.000    | 0.5668                      |

|    |       |      |                     |                 |        |
|----|-------|------|---------------------|-----------------|--------|
| 48 | Zone1 | 7 m  | College / Institute | 50.001-100.000  | 0.5337 |
| 49 | Zone1 | 7 f  | College / Institute | 50.001-100.000  | 0.5699 |
| 50 | Zone1 | 7 f  | College / Institute | 50.001-100.000  | 0.5474 |
| 51 | Zone1 | 7 m  | College / Institute | 50.001-100.000  | 0.5582 |
| 52 | Zone1 | 7 f  | College / Institute | 50.001-100.000  | 0.5495 |
| 53 | Zone1 | 7 f  | College / Institute | 50.001-100.000  | 0.5663 |
| 54 | Zone1 | 7 m  | College / Institute | 50.001-100.000  | 0.5709 |
| 55 | Zone1 | 7 f  | College / Institute | 50.001-100.000  | 0.5673 |
| 56 | Zone1 | 7 m  | High school         | 50.001-100.000  | 0.5969 |
| 57 | Zone1 | 8 m  | College / Institute | 50.001-100.000  | 0.5563 |
| 58 | Zone1 | 8 f  | College / Institute | 50.001-100.000  | 0.5471 |
| 59 | Zone1 | 8 f  | College / Institute | 50.001-100.000  | 0.5179 |
| 60 | Zone1 | 8 m  | College / Institute | 50.001-100.000  | 0.5571 |
| 61 | Zone1 | 8 m  | College / Institute | 50.001-100.000  | 0.5642 |
| 62 | Zone1 | 8 m  | College / Institute | 50.001-100.000  | 0.5556 |
| 63 | Zone1 | 9 m  | College / Institute | 50.001-100.000  | 0.5306 |
| 64 | Zone1 | 9 m  | College / Institute | 50.001-100.000  | 0.5635 |
| 65 | Zone1 | 9 f  | College / Institute | 50.001-100.000  | 0.5779 |
| 66 | Zone1 | 9 f  | College / Institute | 50.001-100.000  | 0.5386 |
| 67 | Zone1 | 9 f  | College / Institute | 50.001-100.000  | 0.5290 |
| 68 | Zone1 | 9 f  | High school         | 50.001-100.000  | 0.5925 |
| 69 | Zone1 | 9 m  | College / Institute | 50.001-100.000  | 0.5537 |
| 70 | Zone1 | 10 m | College / Institute | 50.001-100.000  | 0.5356 |
| 71 | Zone1 | 10 m | College / Institute | 50.001-100.000  | 0.5654 |
| 72 | Zone1 | 10 f | Postgraduate        | 50.001-100.000  | 0.5268 |
| 73 | Zone1 | 10 f | College / Institute | 50.001-100.000  | 0.5737 |
| 74 | Zone1 | 10 f | Postgraduate        | 50.001-100.000  | 0.5179 |
| 75 | Zone1 | 10 f | Postgraduate        | 50.001-100.000  | 0.3276 |
| 76 | Zone2 | 2 f  | Postgraduate        | 50.001-100.000  | 0.5411 |
| 77 | Zone2 | 2 f  | Postgraduate        | 50.001-100.000  | 0.5391 |
| 78 | Zone2 | 2 f  | Postgraduate        | 50.001-100.000  | 0.5675 |
| 79 | Zone2 | 2 f  | Postgraduate        | 50.001-100.000  | 0.5432 |
| 80 | Zone2 | 2 f  | College / Institute | 50.001-100.000  | 0.5609 |
| 81 | Zone2 | 3 f  | College / Institute | 50.001-100.000  | 0.6003 |
| 82 | Zone2 | 3 f  | College / Institute | 50.001-100.000  | 0.6013 |
| 83 | Zone2 | 3 f  | College / Institute | 50.001-100.000  | 0.6030 |
| 84 | Zone2 | 3 f  | Postgraduate        | 50.001-100.000  | 0.5806 |
| 85 | Zone2 | 3 m  | College / Institute | 50.001-100.000  | 0.5825 |
| 86 | Zone2 | 3 m  | Postgraduate        | 50.001-100.000  | 0.5892 |
| 87 | Zone2 | 4 f  | College / Institute | 50.001-100.000  | 0.6891 |
| 88 | Zone2 | 4 m  | College / Institute | 50.001-100.000  | 0.6098 |
| 89 | Zone2 | 4 m  | College / Institute | 50.001-100.000  | 0.6893 |
| 90 | Zone2 | 4 f  | College / Institute | 50.001-100.000  | 0.6029 |
| 91 | Zone2 | 4 f  | College / Institute | 50.001-100.000  | 0.6882 |
| 92 | Zone2 | 4 f  | College / Institute | 50.001-100.000  | 0.6733 |
| 93 | Zone2 | 4 f  | College / Institute | 50.001-100.000  | 0.6729 |
| 94 | Zone2 | 5 f  | College / Institute | 100.001-150.000 | 0.7115 |
| 95 | Zone2 | 5 f  | College / Institute | 150.001-200.000 | 0.7043 |

|           |     |                              |                   |        |
|-----------|-----|------------------------------|-------------------|--------|
| 96 Zone2  | 5 m | College / Institute          | 100.001-150.000   | 0.7072 |
| 97 Zone2  | 5 f | College / Institute          | More than 200.000 | 0.7077 |
| 98 Zone2  | 5 m | High school                  | 100.001-150.000   | 0.7185 |
| 99 Zone2  | 5 f | College / Institute          | 150.001-200.000   | 0.7086 |
| 100 Zone2 | 5 m | College / Institute          | 100.001-150.000   | 0.7071 |
| 101 Zone2 | 5 m | High school                  | 150.001-200.000   | 0.7102 |
| 102 Zone2 | 5 f | College / Institute          | 100.001-150.000   | 0.7024 |
| 103 Zone2 | 5 m | College / Institute          | 150.001-200.000   | 0.7086 |
| 104 Zone2 | 5 f | High school                  | 100.001-150.000   | 0.7245 |
| 105 Zone2 | 6 m | College / Institute          | 50.001-100.000    | 0.6912 |
| 106 Zone2 | 6 f | College / Institute          | 50.001-100.000    | 0.6923 |
| 107 Zone2 | 6 f | High school                  | 100.001-150.000   | 0.7120 |
| 108 Zone2 | 6 f | High school                  | 100.001-150.000   | 0.7115 |
| 109 Zone2 | 6 m | High school                  | 150.001-200.000   | 0.7097 |
| 110 Zone2 | 6 f | College / Institute          | 50.001-100.000    | 0.5872 |
| 111 Zone2 | 6 m | High school                  | 150.001-200.000   | 0.7108 |
| 112 Zone2 | 6 f | High school                  | 100.001-150.000   | 0.7116 |
| 113 Zone2 | 6 m | College / Institute          | 50.001-100.000    | 0.6925 |
| 114 Zone2 | 6 f | College / Institute          | 50.001-100.000    | 0.5922 |
| 115 Zone2 | 6 f | College / Institute          | 50.001-100.000    | 0.5881 |
| 116 Zone2 | 6 m | College / Institute          | 50.001-100.000    | 0.5845 |
| 117 Zone2 | 6 f | College / Institute          | 50.001-100.000    | 0.5990 |
| 118 Zone2 | 7 f | College / Institute          | Less than 50.000  | 0.6834 |
| 119 Zone2 | 7 f | College / Institute          | Less than 50.000  | 0.6850 |
| 120 Zone2 | 7 f | High school                  | 50.001-100.000    | 0.6970 |
| 121 Zone2 | 7 f | College / Institute          | 50.001-100.000    | 0.6989 |
| 122 Zone2 | 7 f | High school                  | 50.001-100.000    | 0.7023 |
| 123 Zone2 | 7 f | High school                  | 150.001-200.000   | 0.7030 |
| 124 Zone2 | 7 f | High school                  | 100.001-150.000   | 0.7066 |
| 125 Zone2 | 7 m | High school                  | 150.001-200.000   | 0.7097 |
| 126 Zone2 | 7 f | High school                  | 100.001-150.000   | 0.7024 |
| 127 Zone2 | 7 m | College / Institute          | 50.001-100.000    | 0.6993 |
| 128 Zone2 | 7 f | High school                  | 50.001-100.000    | 0.7028 |
| 129 Zone2 | 7 m | College / Institute          | 50.001-100.000    | 0.6983 |
| 130 Zone2 | 7 m | High school                  | 150.001-200.000   | 0.7034 |
| 131 Zone2 | 8 m | Junior high or middle school | 100.001-150.000   | 0.7110 |
| 132 Zone2 | 8 m | High school                  | 100.001-150.000   | 0.7099 |
| 133 Zone2 | 8 m | Junior high or middle school | 100.001-150.000   | 0.7100 |
| 134 Zone2 | 8 f | Junior high or middle school | 100.001-150.000   | 0.7104 |
| 135 Zone2 | 8 f | High school                  | 100.001-150.000   | 0.7094 |
| 136 Zone2 | 8 m | High school                  | 100.001-150.000   | 0.7097 |
| 137 Zone2 | 9 m | Elementary school            | 100.001-150.000   | 0.7204 |
| 138 Zone2 | 9 m | Elementary school            | 100.001-150.000   | 0.7201 |
| 139 Zone2 | 9 f | Junior high or middle school | 100.001-150.000   | 0.7203 |
| 140 Zone2 | 9 f | Junior high or middle school | 100.001-150.000   | 0.7209 |
| 141 Zone2 | 9 f | Junior high or middle school | 100.001-150.000   | 0.7193 |
| 142 Zone2 | 9 f | Junior high or middle school | 100.001-150.000   | 0.7195 |
| 143 Zone2 | 9 f | Elementary school            | 100.001-150.000   | 0.7203 |

|     |       |      |                              |                  |        |
|-----|-------|------|------------------------------|------------------|--------|
| 144 | Zone2 | 10 f | High school                  | 50.001-100.000   | 0.7018 |
| 145 | Zone2 | 10 m | High school                  | 100.001-150.000  | 0.7081 |
| 146 | Zone2 | 10 m | High school                  | 50.001-100.000   | 0.7009 |
| 147 | Zone2 | 10 m | College / Institute          | 50.001-100.000   | 0.6880 |
| 148 | Zone2 | 10 f | High school                  | 50.001-100.000   | 0.7028 |
| 149 | Zone2 | 10 m | Junior high or middle school | 100.001-150.000  | 0.7126 |
| 150 | Zone2 | 10 m | High school                  | 50.001-100.000   | 0.7034 |
| 151 | Zone3 | 2 m  | College / Institute          | 50.001-100.000   | 0.5366 |
| 152 | Zone3 | 2 m  | Postgraduate                 | 50.001-100.000   | 0.5293 |
| 153 | Zone3 | 2 m  | College / Institute          | 50.001-100.000   | 0.5435 |
| 154 | Zone3 | 2 m  | College / Institute          | 50.001-100.000   | 0.5322 |
| 155 | Zone3 | 3 m  | Postgraduate                 | 50.001-100.000   | 0.3933 |
| 156 | Zone3 | 3 m  | College / Institute          | 50.001-100.000   | 0.5401 |
| 157 | Zone3 | 3 m  | Postgraduate                 | 50.001-100.000   | 0.4887 |
| 158 | Zone3 | 3 m  | College / Institute          | 50.001-100.000   | 0.5853 |
| 159 | Zone3 | 3 m  | College / Institute          | 50.001-100.000   | 0.5853 |
| 160 | Zone3 | 3 m  | College / Institute          | 50.001-100.000   | 0.5861 |
| 161 | Zone3 | 3 m  | College / Institute          | 50.001-100.000   | 0.5895 |
| 162 | Zone3 | 4 m  | College / Institute          | 50.001-100.000   | 0.6050 |
| 163 | Zone3 | 4 m  | College / Institute          | 50.001-100.000   | 0.6017 |
| 164 | Zone3 | 4 m  | College / Institute          | 50.001-100.000   | 0.5931 |
| 165 | Zone3 | 4 m  | College / Institute          | 50.001-100.000   | 0.6094 |
| 166 | Zone3 | 4 m  | College / Institute          | 50.001-100.000   | 0.6015 |
| 167 | Zone3 | 4 m  | College / Institute          | 50.001-100.000   | 0.6041 |
| 168 | Zone3 | 4 m  | College / Institute          | 50.001-100.000   | 0.6010 |
| 169 | Zone3 | 4 m  | College / Institute          | 50.001-100.000   | 0.6026 |
| 170 | Zone3 | 5 f  | College / Institute          | 50.001-100.000   | 0.5987 |
| 171 | Zone3 | 5 m  | College / Institute          | 50.001-100.000   | 0.6100 |
| 172 | Zone3 | 5 m  | College / Institute          | 150.001-200.000  | 0.7106 |
| 173 | Zone3 | 5 m  | College / Institute          | 50.001-100.000   | 0.7001 |
| 174 | Zone3 | 5 m  | College / Institute          | 50.001-100.000   | 0.6933 |
| 175 | Zone3 | 5 f  | College / Institute          | 50.001-100.000   | 0.7057 |
| 176 | Zone3 | 5 f  | College / Institute          | 50.001-100.000   | 0.7000 |
| 177 | Zone3 | 5 f  | College / Institute          | 50.001-100.000   | 0.6958 |
| 178 | Zone3 | 5 m  | College / Institute          | 50.001-100.000   | 0.7035 |
| 179 | Zone3 | 5 f  | College / Institute          | 50.001-100.000   | 0.7014 |
| 180 | Zone3 | 5 m  | College / Institute          | Less than 50.000 | 0.6904 |
| 181 | Zone3 | 6 f  | High school                  | 100.001-150.000  | 0.7827 |
| 182 | Zone3 | 6 m  | High school                  | 100.001-150.000  | 0.8191 |
| 183 | Zone3 | 6 m  | High school                  | 100.001-150.000  | 0.8171 |
| 184 | Zone3 | 6 f  | Junior high or middle school | 150.001-200.000  | 0.8203 |
| 185 | Zone3 | 6 f  | Junior high or middle school | 100.001-150.000  | 0.8212 |
| 186 | Zone3 | 6 m  | Junior high or middle school | 100.001-150.000  | 0.8255 |
| 187 | Zone3 | 6 f  | High school                  | 150.001-200.000  | 0.7302 |
| 188 | Zone3 | 6 m  | Junior high or middle school | 100.001-150.000  | 0.8202 |
| 189 | Zone3 | 6 f  | College / Institute          | 100.001-150.000  | 0.7238 |
| 190 | Zone3 | 6 m  | High school                  | 100.001-150.000  | 0.8206 |
| 191 | Zone3 | 6 f  | High school                  | 150.001-200.000  | 0.8156 |

|     |       |      |                              |                   |        |
|-----|-------|------|------------------------------|-------------------|--------|
| 192 | Zone3 | 6 m  | Junior high or middle school | 100.001-150.000   | 0.8217 |
| 193 | Zone3 | 6 m  | High school                  | 100.001-150.000   | 0.7302 |
| 194 | Zone3 | 6 m  | High school                  | 100.001-150.000   | 0.7187 |
| 195 | Zone3 | 6 m  | High school                  | 150.001-200.000   | 0.7219 |
| 196 | Zone3 | 6 f  | High school                  | 100.001-150.000   | 0.7237 |
| 197 | Zone3 | 7 m  | High school                  | 100.001-150.000   | 0.8120 |
| 198 | Zone3 | 7 m  | High school                  | 100.001-150.000   | 0.8118 |
| 199 | Zone3 | 7 m  | High school                  | 100.001-150.000   | 0.8101 |
| 200 | Zone3 | 7 m  | High school                  | 150.001-200.000   | 0.8113 |
| 201 | Zone3 | 7 m  | High school                  | More than 200.000 | 0.8108 |
| 202 | Zone3 | 7 m  | High school                  | 150.001-200.000   | 0.8111 |
| 203 | Zone3 | 7 m  | College / Institute          | 150.001-200.000   | 0.7618 |
| 204 | Zone3 | 7 m  | College / Institute          | More than 200.000 | 0.7120 |
| 205 | Zone3 | 7 m  | High school                  | 150.001-200.000   | 0.8113 |
| 206 | Zone3 | 7 m  | High school                  | 150.001-200.000   | 0.8115 |
| 207 | Zone3 | 7 m  | High school                  | 150.001-200.000   | 0.8119 |
| 208 | Zone3 | 8 m  | High school                  | 100.001-150.000   | 0.7315 |
| 209 | Zone3 | 8 m  | High school                  | 100.001-150.000   | 0.7105 |
| 210 | Zone3 | 8 m  | Elementary school            | 100.001-150.000   | 0.8349 |
| 211 | Zone3 | 8 m  | Elementary school            | 100.001-150.000   | 0.8350 |
| 212 | Zone3 | 8 m  | Elementary school            | 100.001-150.000   | 0.8354 |
| 213 | Zone3 | 8 m  | Junior high or middle school | 100.001-150.000   | 0.8344 |
| 214 | Zone3 | 8 m  | High school                  | 100.001-150.000   | 0.8092 |
| 215 | Zone3 | 8 f  | High school                  | 100.001-150.000   | 0.8095 |
| 216 | Zone3 | 8 m  | High school                  | 100.001-150.000   | 0.8104 |
| 217 | Zone3 | 9 m  | Junior high or middle school | 100.001-150.000   | 0.8311 |
| 218 | Zone3 | 9 m  | Elementary school            | 100.001-150.000   | 0.8304 |
| 219 | Zone3 | 9 m  | Elementary school            | 100.001-150.000   | 0.8306 |
| 220 | Zone3 | 9 m  | Elementary school            | 100.001-150.000   | 0.8314 |
| 221 | Zone3 | 9 m  | High school                  | 100.001-150.000   | 0.7877 |
| 222 | Zone3 | 10 m | High school                  | 100.001-150.000   | 0.8148 |
| 223 | Zone3 | 10 f | High school                  | 100.001-150.000   | 0.8099 |
| 224 | Zone3 | 10 m | High school                  | 100.001-150.000   | 0.8133 |
| 225 | Zone3 | 10 m | High school                  | 100.001-150.000   | 0.8034 |
| 226 | Zone4 | 2 f  | College / Institute          | 50.001-100.000    | 0.5880 |
| 227 | Zone4 | 2 m  | Postgraduate                 | 50.001-100.000    | 0.5665 |
| 228 | Zone4 | 2 m  | Postgraduate                 | 50.001-100.000    | 0.5410 |
| 229 | Zone4 | 2 m  | College / Institute          | 50.001-100.000    | 0.5795 |
| 230 | Zone4 | 2 m  | College / Institute          | 50.001-100.000    | 0.5768 |
| 231 | Zone4 | 3 m  | College / Institute          | 50.001-100.000    | 0.6885 |
| 232 | Zone4 | 3 m  | College / Institute          | 50.001-100.000    | 0.6895 |
| 233 | Zone4 | 3 m  | College / Institute          | 50.001-100.000    | 0.6915 |
| 234 | Zone4 | 3 m  | College / Institute          | 50.001-100.000    | 0.6869 |
| 235 | Zone4 | 3 m  | High school                  | 50.001-100.000    | 0.7028 |
| 236 | Zone4 | 3 f  | College / Institute          | 50.001-100.000    | 0.6032 |
| 237 | Zone4 | 4 m  | College / Institute          | 50.001-100.000    | 0.6737 |
| 238 | Zone4 | 4 f  | College / Institute          | 50.001-100.000    | 0.6890 |
| 239 | Zone4 | 4 m  | College / Institute          | 100.001-150.000   | 0.7140 |

|     |       |     |                              |                  |        |
|-----|-------|-----|------------------------------|------------------|--------|
| 240 | Zone4 | 4 m | College / Institute          | 50.001-100.000   | 0.6896 |
| 241 | Zone4 | 4 m | College / Institute          | 50.001-100.000   | 0.6921 |
| 242 | Zone4 | 4 f | College / Institute          | Less than 50.000 | 0.6722 |
| 243 | Zone4 | 4 m | High school                  | 100.001-150.000  | 0.7151 |
| 244 | Zone4 | 4 m | College / Institute          | 50.001-100.000   | 0.6756 |
| 245 | Zone4 | 4 m | College / Institute          | 50.001-100.000   | 0.6888 |
| 246 | Zone4 | 5 m | College / Institute          | 50.001-100.000   | 0.6938 |
| 247 | Zone4 | 5 f | High school                  | 50.001-100.000   | 0.7100 |
| 248 | Zone4 | 5 f | Elementary school            | 100.001-150.000  | 0.8310 |
| 249 | Zone4 | 5 m | College / Institute          | 50.001-100.000   | 0.7029 |
| 250 | Zone4 | 5 f | College / Institute          | 50.001-100.000   | 0.7106 |
| 251 | Zone4 | 5 f | College / Institute          | 50.001-100.000   | 0.7043 |
| 252 | Zone4 | 5 m | College / Institute          | 50.001-100.000   | 0.7058 |
| 253 | Zone4 | 5 f | High school                  | 100.001-150.000  | 0.7188 |
| 254 | Zone4 | 5 m | College / Institute          | 50.001-100.000   | 0.7047 |
| 255 | Zone4 | 6 m | High school                  | 100.001-150.000  | 0.7827 |
| 256 | Zone4 | 6 m | High school                  | 100.001-150.000  | 0.8193 |
| 257 | Zone4 | 6 m | High school                  | 100.001-150.000  | 0.8173 |
| 258 | Zone4 | 6 m | High school                  | 100.001-150.000  | 0.8204 |
| 259 | Zone4 | 6 f | High school                  | 100.001-150.000  | 0.8212 |
| 260 | Zone4 | 6 m | Junior high or middle school | 100.001-150.000  | 0.8254 |
| 261 | Zone4 | 6 m | Junior high or middle school | 100.001-150.000  | 0.8284 |
| 262 | Zone4 | 6 m | Junior high or middle school | 150.001-200.000  | 0.8202 |
| 263 | Zone4 | 6 f | Junior high or middle school | 150.001-200.000  | 0.8168 |
| 264 | Zone4 | 6 m | Junior high or middle school | 100.001-150.000  | 0.8205 |
| 265 | Zone4 | 6 m | High school                  | 100.001-150.000  | 0.8154 |
| 266 | Zone4 | 6 f | Junior high or middle school | 150.001-200.000  | 0.8212 |
| 267 | Zone4 | 6 f | College / Institute          | 150.001-200.000  | 0.7301 |
| 268 | Zone4 | 6 m | College / Institute          | 50.001-100.000   | 0.7186 |
| 269 | Zone4 | 6 m | College / Institute          | 150.001-200.000  | 0.7219 |
| 270 | Zone4 | 6 m | College / Institute          | 100.001-150.000  | 0.7238 |
| 271 | Zone4 | 6 m | High school                  | 100.001-150.000  | 0.7281 |
| 272 | Zone4 | 7 m | High school                  | 100.001-150.000  | 0.7709 |
| 273 | Zone4 | 7 m | College / Institute          | 150.001-200.000  | 0.7712 |
| 274 | Zone4 | 7 m | High school                  | 150.001-200.000  | 0.7648 |
| 275 | Zone4 | 7 m | College / Institute          | 100.001-150.000  | 0.7799 |
| 276 | Zone4 | 7 m | College / Institute          | 100.001-150.000  | 0.7542 |
| 277 | Zone4 | 7 f | College / Institute          | 100.001-150.000  | 0.7584 |
| 278 | Zone4 | 7 m | College / Institute          | 150.001-200.000  | 0.7516 |
| 279 | Zone4 | 7 m | College / Institute          | 50.001-100.000   | 0.7118 |
| 280 | Zone4 | 7 f | High school                  | 150.001-200.000  | 0.7665 |
| 281 | Zone4 | 7 m | High school                  | 150.001-200.000  | 0.7524 |
| 282 | Zone4 | 7 m | High school                  | 100.001-150.000  | 0.7830 |
| 283 | Zone4 | 7 m | High school                  | 100.001-150.000  | 0.7535 |
| 284 | Zone4 | 7 m | High school                  | 150.001-200.000  | 0.7627 |
| 285 | Zone4 | 8 m | High school                  | 100.001-150.000  | 0.7584 |
| 286 | Zone4 | 8 m | High school                  | 100.001-150.000  | 0.7619 |
| 287 | Zone4 | 8 m | High school                  | 100.001-150.000  | 0.7681 |

|     |       |      |                              |                   |        |
|-----|-------|------|------------------------------|-------------------|--------|
| 288 | Zone4 | 8 m  | High school                  | 100.001-150.000   | 0.7759 |
| 289 | Zone4 | 8 m  | High school                  | 100.001-150.000   | 0.7981 |
| 290 | Zone4 | 8 m  | High school                  | 100.001-150.000   | 0.7831 |
| 291 | Zone4 | 8 m  | High school                  | 150.001-200.000   | 0.8094 |
| 292 | Zone4 | 9 m  | High school                  | 100.001-150.000   | 0.7200 |
| 293 | Zone4 | 9 m  | High school                  | 150.001-200.000   | 0.8090 |
| 294 | Zone4 | 9 m  | Elementary school            | 100.001-150.000   | 0.8177 |
| 295 | Zone4 | 9 m  | Elementary school            | 100.001-150.000   | 0.8148 |
| 296 | Zone4 | 9 m  | High school                  | 100.001-150.000   | 0.7893 |
| 297 | Zone4 | 10 f | High school                  | 150.001-200.000   | 0.8095 |
| 298 | Zone4 | 10 m | Elementary school            | More than 200.000 | 0.8748 |
| 299 | Zone4 | 10 f | Elementary school            | 150.001-200.000   | 0.8155 |
| 300 | Zone4 | 10 m | Junior high or middle school | More than 200.000 | 0.8108 |

| Storage        | separate | Materials separated                       | Responsibilities of separation |      |
|----------------|----------|-------------------------------------------|--------------------------------|------|
| Plastic bag    | Yes      | Paper, Plastic, Glass, Textile, and Metal | Father                         |      |
| Plastic bag    | No       |                                           | 0.00                           | 0.00 |
| Plastic bag    | Yes      | Plastic and Glass                         | Children                       |      |
| Plastic bag    | Yes      | Plastic and Glass                         | Mother or housemaid            |      |
| Plastic bag    | Yes      | Battery and electronic waste              | Mother or housemaid            |      |
| Plastic bag    | Yes      | Paper, Plastic, Glass, Textile, and Metal | Mother or housemaid            |      |
| Plastic bag    | Yes      | Plastic and Glass                         | Mother or housemaid            |      |
| Plastic bag    | Yes      | Battery and electronic waste              | Father                         |      |
| Plastic bag    | No       |                                           | 0.00                           | 0.00 |
| Plastic bag    | Yes      | Paper, Plastic, Glass, Textile, and Metal | Children                       |      |
| box            | Yes      | Plastic and Glass                         | Mother or housemaid            |      |
| Plastic bag    | Yes      | Paper, Plastic, Glass, Textile, and Metal | Father                         |      |
| Plastic bag    | No       |                                           | 0.00                           | 0.00 |
| Plastic bag    | Yes      | Plastic and Glass                         | Mother or housemaid            |      |
| Plastic bag    | No       |                                           | 0.00                           | 0.00 |
| Plastic bag    | No       |                                           | 0.00                           | 0.00 |
| Plastic bag    | No       |                                           | 0.00                           | 0.00 |
| Plastic bag    | Yes      | Paper, Plastic, Glass, Textile, and Metal | Father                         |      |
| Basket         | Yes      | Plastic and Glass                         | Mother or housemaid            |      |
| Mixed methods  | Yes      | Plastic and Glass                         | Mother or housemaid            |      |
| box            | No       |                                           | 0.00                           | 0.00 |
| Plastic bag    | No       |                                           | 0.00                           | 0.00 |
| Plastic bag    | Yes      | Plastic and Glass                         | Mother or housemaid            |      |
| Plastic bag    | Yes      | Paper, Plastic, Glass, Textile, and Metal | Father                         |      |
| Plastic bag    | Yes      | Plastic and Glass                         | Children                       |      |
| Plastic bag    | Yes      | Paper, Plastic, Glass, Textile, and Metal | Mother or housemaid            |      |
| Plastic bag    | Yes      | Plastic and Glass                         | Father                         |      |
| Basket         | Yes      | Paper, Plastic, Glass, Textile, and Metal | Mother or housemaid            |      |
| Plastic bag    | Yes      | Plastic and Glass                         | All family member              |      |
| Plastic bag    | Yes      | Paper, Plastic, Glass, Textile, and Metal | Mother or housemaid            |      |
| Basket         | Yes      | Plastic and Glass                         | Mother or housemaid            |      |
| Open container | No       |                                           | 0.00                           | 0.00 |
| Mixed methods  | No       |                                           | 0.00                           | 0.00 |
| Plastic bag    | Yes      | Plastic and Glass                         | Mother or housemaid            |      |
| Plastic bag    | No       |                                           | 0.00                           | 0.00 |
| Plastic bag    | Yes      | Paper, Plastic, Glass, Textile, and Metal | All family member              |      |
| Mixed methods  | Yes      | Plastic and Glass                         | Mother or housemaid            |      |
| Open container | No       |                                           | 0.00                           | 0.00 |
| Basket         | No       |                                           | 0.00                           | 0.00 |
| Plastic bag    | Yes      | Paper, Plastic, Glass, Textile, and Metal | Mother or housemaid            |      |
| Plastic bag    | No       |                                           | 0.00                           | 0.00 |
| Plastic bag    | No       |                                           | 0.00                           | 0.00 |
| box            | Yes      | Paper, Plastic, Glass, Textile, and Metal | All family member              |      |
| Open container | Yes      | Plastic and Glass                         | Mother or housemaid            |      |
| Basket         | Yes      | Plastic and Glass                         | Mother or housemaid            |      |
| Open container | Yes      | Paper, Plastic, Glass, Textile, and Metal | All family member              |      |
| Plastic bag    | Yes      | Plastic and Glass                         | Mother or housemaid            |      |



|                |     |                                           |                     |      |
|----------------|-----|-------------------------------------------|---------------------|------|
| Mixed methods  | Yes | Paper, Plastic, Glass, Textile, and Metal | Father              |      |
| Open container | No  |                                           |                     | 0.00 |
| Basket         | Yes | Plastic and Glass                         | Mother or housemaid |      |
| Mixed methods  | No  |                                           |                     | 0.00 |
| box            | Yes | Paper, Plastic, Glass, Textile, and Metal | Children            |      |
| Mixed methods  | Yes | Plastic and Glass                         | Mother or housemaid |      |
| box            | Yes | Plastic and Glass                         | Mother or housemaid |      |
| Mixed methods  | Yes | Paper, Plastic, Glass, Textile, and Metal | Father              |      |
| Plastic bag    | Yes | Plastic and Glass                         | Mother or housemaid |      |
| Open container | No  |                                           |                     | 0.00 |
| Plastic bag    | No  |                                           |                     | 0.00 |
| Mixed methods  | No  |                                           |                     | 0.00 |
| Plastic bag    | Yes | Battery and electronic waste              | Father              |      |
| Plastic bag    | Yes | Plastic and Glass                         | All family member   |      |
| Mixed methods  | Yes | Paper, Plastic, Glass, Textile, and Metal | Children            |      |
| Plastic bag    | Yes | Plastic and Glass                         | Mother or housemaid |      |
| Plastic bag    | Yes | Plastic and Glass                         | Mother or housemaid |      |
| Open container | Yes | Paper, Plastic, Glass, Textile, and Metal | Father              |      |
| Mixed methods  | Yes | Plastic and Glass                         | Mother or housemaid |      |
| Open container | Yes | Paper, Plastic, Glass, Textile, and Metal | Children            |      |
| Plastic bag    | Yes | Plastic and Glass                         | Father              |      |
| Plastic bag    | No  |                                           |                     | 0.00 |
| Plastic bag    | No  |                                           |                     | 0.00 |
| Open container | Yes | Paper, Plastic, Glass, Textile, and Metal | Father              |      |
| Plastic bag    | Yes | Plastic and Glass                         | Children            |      |
| Plastic bag    | No  |                                           |                     | 0.00 |
| Plastic bag    | No  |                                           |                     | 0.00 |
| Plastic bag    | Yes | Plastic and Glass                         | Mother or housemaid |      |
| Plastic bag    | Yes | Paper, Plastic, Glass, Textile, and Metal | Father              |      |
| box            | Yes | Plastic and Glass                         | Mother or housemaid |      |
| Plastic bag    | Yes | Plastic and Glass                         | Mother or housemaid |      |
| Plastic bag    | No  |                                           |                     | 0.00 |
| Plastic bag    | Yes | Plastic and Glass                         | Mother or housemaid |      |
| Plastic bag    | No  |                                           |                     | 0.00 |
| Plastic bag    | No  |                                           |                     | 0.00 |
| Plastic bag    | No  |                                           |                     | 0.00 |
| Plastic bag    | Yes | Plastic and Glass                         | Children            |      |
| Basket         | Yes | Plastic and Glass                         | Mother or housemaid |      |
| Mixed methods  | Yes | Paper, Plastic, Glass, Textile, and Metal | Mother or housemaid |      |
| box            | Yes | Plastic and Glass                         | All family member   |      |
| Plastic bag    | Yes | Battery and electronic waste              | Father              |      |
| Plastic bag    | Yes | Plastic and Glass                         | Father              |      |
| Plastic bag    | Yes | Plastic and Glass                         | Mother or housemaid |      |
| Plastic bag    | Yes | Paper, Plastic, Glass, Textile, and Metal | All family member   |      |
| Plastic bag    | Yes | Plastic and Glass                         | Children            |      |
| Plastic bag    | No  |                                           |                     | 0.00 |
| Basket         | Yes | Paper, Plastic, Glass, Textile, and Metal | Mother or housemaid |      |
| Plastic bag    | Yes | Plastic and Glass                         | Mother or housemaid |      |

|                |     |                                           |                     |      |
|----------------|-----|-------------------------------------------|---------------------|------|
| Plastic bag    | Yes | Paper, Plastic, Glass, Textile, and Metal | Father              |      |
| Basket         | No  |                                           |                     | 0.00 |
| Open container | Yes | Plastic and Glass                         | Children            |      |
| Mixed methods  | No  |                                           |                     | 0.00 |
| Plastic bag    | No  |                                           |                     | 0.00 |
| Plastic bag    | No  |                                           |                     | 0.00 |
| Plastic bag    | Yes | Paper, Plastic, Glass, Textile, and Metal | Mother or housemaid |      |
| Basket         | Yes | Plastic and Glass                         | Father              |      |
| Mixed methods  | Yes | Plastic and Glass                         | Mother or housemaid |      |
| Plastic bag    | No  |                                           |                     | 0.00 |
| Mixed methods  | No  |                                           |                     | 0.00 |
| box            | Yes | Paper, Plastic, Glass, Textile, and Metal | All family member   |      |
| Mixed methods  | Yes | Battery and electronic waste              | Father              |      |
| Plastic bag    | Yes | Plastic and Glass                         | Children            |      |
| Mixed methods  | Yes | Plastic and Glass                         | Mother or housemaid |      |
| Plastic bag    | Yes | Paper, Plastic, Glass, Textile, and Metal | Mother or housemaid |      |
| Mixed methods  | Yes | Plastic and Glass                         | Mother or housemaid |      |
| Plastic bag    | Yes | Plastic and Glass                         | Mother or housemaid |      |
| Plastic bag    | No  |                                           |                     | 0.00 |
| Mixed methods  | Yes | Plastic and Glass                         | Mother or housemaid |      |
| Plastic bag    | No  |                                           |                     | 0.00 |
| Plastic bag    | Yes | Plastic and Glass                         | Father              |      |
| Plastic bag    | Yes | Battery and electronic waste              | Father              |      |
| Mixed methods  | Yes | Plastic and Glass                         | All family member   |      |
| Plastic bag    | Yes | Paper, Plastic, Glass, Textile, and Metal | Mother or housemaid |      |
| Plastic bag    | Yes | Plastic and Glass                         | Children            |      |
| Plastic bag    | No  |                                           |                     | 0.00 |
| Plastic bag    | No  |                                           |                     | 0.00 |
| Open container | No  |                                           |                     | 0.00 |
| Plastic bag    | Yes | Paper, Plastic, Glass, Textile, and Metal | Father              |      |
| Plastic bag    | Yes | Plastic and Glass                         | Mother or housemaid |      |
| Plastic bag    | Yes | Paper, Plastic, Glass, Textile, and Metal | Mother or housemaid |      |
| Plastic bag    | Yes | Plastic and Glass                         | All family member   |      |
| Plastic bag    | Yes | Plastic and Glass                         | Mother or housemaid |      |
| Plastic bag    | Yes | Paper, Plastic, Glass, Textile, and Metal | Mother or housemaid |      |
| Mixed methods  | Yes | Plastic and Glass                         | Father              |      |
| Open container | Yes | Plastic and Glass                         | Mother or housemaid |      |
| Basket         | Yes | Paper, Plastic, Glass, Textile, and Metal | Father              |      |
| Plastic bag    | No  |                                           |                     | 0.00 |
| Plastic bag    | No  |                                           |                     | 0.00 |
| Plastic bag    | Yes | Plastic and Glass                         | Father              |      |
| Plastic bag    | Yes | Plastic and Glass                         | Mother or housemaid |      |
| Open container | Yes | Plastic and Glass                         | Mother or housemaid |      |
| Basket         | No  |                                           |                     | 0.00 |
| Open container | Yes | Plastic and Glass                         | Father              |      |
| Plastic bag    | No  |                                           |                     | 0.00 |
| Mixed methods  | Yes | Plastic and Glass                         | Mother or housemaid |      |
| Open container | Yes | Plastic and Glass                         | Mother or housemaid |      |

|                |     |                                           |      |                     |      |
|----------------|-----|-------------------------------------------|------|---------------------|------|
| Basket         | Yes | Plastic and Glass                         |      | Mother or housemaid |      |
| Plastic bag    | No  |                                           | 0.00 |                     | 0.00 |
| Plastic bag    | No  |                                           | 0.00 |                     | 0.00 |
| Plastic bag    | Yes | Plastic and Glass                         |      | Mother or housemaid |      |
| Plastic bag    | Yes | Plastic and Glass                         |      | Mother or housemaid |      |
| Plastic bag    | Yes | Plastic and Glass                         |      | Mother or housemaid |      |
| Open container | Yes | Plastic and Glass                         |      | Father              |      |
| Plastic bag    | Yes | Plastic and Glass                         |      | All family member   |      |
| Mixed methods  | No  |                                           | 0.00 |                     | 0.00 |
| box            | Yes | Plastic and Glass                         |      | Mother or housemaid |      |
| Mixed methods  | No  |                                           | 0.00 |                     | 0.00 |
| Plastic bag    | No  |                                           | 0.00 |                     | 0.00 |
| Mixed methods  | No  |                                           | 0.00 |                     | 0.00 |
| Plastic bag    | Yes | Plastic and Glass                         |      | Children            |      |
| Open container | Yes | Paper, Plastic, Glass, Textile, and Metal |      | Mother or housemaid |      |
| Plastic bag    | Yes | Battery and electronic waste              |      | Mother or housemaid |      |
| Mixed methods  | Yes | Plastic and Glass                         |      | Mother or housemaid |      |
| Plastic bag    | Yes | Paper, Plastic, Glass, Textile, and Metal |      | Mother or housemaid |      |
| Plastic bag    | Yes | Plastic and Glass                         |      | All family member   |      |
| Mixed methods  | Yes | Paper, Plastic, Glass, Textile, and Metal |      | Mother or housemaid |      |
| Plastic bag    | No  |                                           | 0.00 |                     | 0.00 |
| Plastic bag    | Yes | Plastic and Glass                         |      | Mother or housemaid |      |
| Open container | Yes | Plastic and Glass                         |      | Mother or housemaid |      |
| Mixed methods  | Yes | Battery and electronic waste              |      | Father              |      |
| Open container | Yes | Plastic and Glass                         |      | Mother or housemaid |      |
| Plastic bag    | Yes | Paper, Plastic, Glass, Textile, and Metal |      | Mother or housemaid |      |
| Plastic bag    | Yes | Plastic and Glass                         |      | Mother or housemaid |      |
| Plastic bag    | No  |                                           | 0.00 |                     | 0.00 |
| Open container | Yes | Paper, Plastic, Glass, Textile, and Metal |      | Mother or housemaid |      |
| Plastic bag    | Yes | Plastic and Glass                         |      | Mother or housemaid |      |
| Plastic bag    | Yes | Paper, Plastic, Glass, Textile, and Metal |      | Mother or housemaid |      |
| Plastic bag    | No  |                                           | 0.00 |                     | 0.00 |
| Plastic bag    | Yes | Plastic and Glass                         |      | Children            |      |
| Plastic bag    | No  |                                           | 0.00 |                     | 0.00 |
| Plastic bag    | No  |                                           | 0.00 |                     | 0.00 |
| Plastic bag    | No  |                                           | 0.00 |                     | 0.00 |
| Plastic bag    | Yes | Paper, Plastic, Glass, Textile, and Metal |      | Mother or housemaid |      |
| Plastic bag    | Yes | Plastic and Glass                         |      | Mother or housemaid |      |
| Basket         | Yes | Paper, Plastic, Glass, Textile, and Metal |      | Mother or housemaid |      |
| Plastic bag    | No  |                                           | 0.00 |                     | 0.00 |
| Mixed methods  | No  |                                           | 0.00 |                     | 0.00 |
| box            | Yes | Plastic and Glass                         |      | Children            |      |
| Plastic bag    | No  |                                           | 0.00 |                     | 0.00 |
| Plastic bag    | Yes | Plastic and Glass                         |      | Mother or housemaid |      |
| Mixed methods  | No  |                                           | 0.00 |                     | 0.00 |
| Open container | No  |                                           | 0.00 |                     | 0.00 |
| Plastic bag    | Yes | Paper, Plastic, Glass, Textile, and Metal |      | Mother or housemaid |      |
| Plastic bag    | Yes | Plastic and Glass                         |      | Mother or housemaid |      |

|                |     |                                           |                     |      |
|----------------|-----|-------------------------------------------|---------------------|------|
| Plastic bag    | Yes | Paper, Plastic, Glass, Textile, and Metal | Mother or housemaid |      |
| Plastic bag    | No  |                                           |                     | 0.00 |
| Plastic bag    | No  |                                           |                     | 0.00 |
| Mixed methods  | Yes | Plastic and Glass                         | Mother or housemaid |      |
| Basket         | No  |                                           |                     | 0.00 |
| Open container | Yes | Plastic and Glass                         | Mother or housemaid |      |
| Plastic bag    | Yes | Paper, Plastic, Glass, Textile, and Metal | Mother or housemaid |      |
| Mixed methods  | Yes | Plastic and Glass                         | Mother or housemaid |      |
| Plastic bag    | No  |                                           |                     | 0.00 |
| Plastic bag    | Yes | Plastic and Glass                         | Children            |      |
| Plastic bag    | No  |                                           |                     | 0.00 |
| Plastic bag    | No  |                                           |                     | 0.00 |
| Plastic bag    | No  |                                           |                     | 0.00 |
| Plastic bag    | Yes | Battery and electronic waste              | Father              |      |
| Plastic bag    | Yes | Plastic and Glass                         | Mother or housemaid |      |
| Plastic bag    | Yes | Paper, Plastic, Glass, Textile, and Metal | Mother or housemaid |      |
| Plastic bag    | Yes | Plastic and Glass                         | Mother or housemaid |      |
| Basket         | Yes | Plastic and Glass                         | Mother or housemaid |      |
| Mixed methods  | Yes | Plastic and Glass                         | Mother or housemaid |      |
| Plastic bag    | No  |                                           |                     | 0.00 |
| Plastic bag    | Yes | Plastic and Glass                         | Mother or housemaid |      |
| Plastic bag    | Yes | Plastic and Glass                         | Mother or housemaid |      |
| Plastic bag    | No  |                                           |                     | 0.00 |
| Plastic bag    | No  |                                           |                     | 0.00 |
| Plastic bag    | Yes | Paper, Plastic, Glass, Textile, and Metal | Father              |      |
| Plastic bag    | Yes | Plastic and Glass                         | Mother or housemaid |      |
| Basket         | No  |                                           |                     | 0.00 |
| Plastic bag    | No  |                                           |                     | 0.00 |
| Plastic bag    | Yes | Plastic and Glass                         | Mother or housemaid |      |
| Basket         | No  |                                           |                     | 0.00 |
| Mixed methods  | Yes | Plastic and Glass                         | Mother or housemaid |      |
| Mixed methods  | Yes | Paper, Plastic, Glass, Textile, and Metal | Mother or housemaid |      |
| Plastic bag    | Yes | Battery and electronic waste              | Father              |      |
| Plastic bag    | No  |                                           |                     | 0.00 |
| Plastic bag    | Yes | Plastic and Glass                         | Mother or housemaid |      |
| Plastic bag    | No  |                                           |                     | 0.00 |
| Mixed methods  | No  |                                           |                     | 0.00 |
| Plastic bag    | No  |                                           |                     | 0.00 |
| Plastic bag    | Yes | Plastic and Glass                         | Mother or housemaid |      |
| Plastic bag    | No  |                                           |                     | 0.00 |
| Mixed methods  | Yes | Paper, Plastic, Glass, Textile, and Metal | Mother or housemaid |      |
| Plastic bag    | No  |                                           |                     | 0.00 |
| Plastic bag    | No  |                                           |                     | 0.00 |
| Plastic bag    | No  |                                           |                     | 0.00 |
| Plastic bag    | Yes | Plastic and Glass                         | Children            |      |
| Plastic bag    | No  |                                           |                     | 0.00 |
| Plastic bag    | Yes | Paper, Plastic, Glass, Textile, and Metal | Mother or housemaid |      |
| Mixed methods  | No  |                                           |                     | 0.00 |

|                |     |                                           |                     |      |
|----------------|-----|-------------------------------------------|---------------------|------|
| Plastic bag    | Yes | Plastic and Glass                         | Mother or housemaid |      |
| Plastic bag    | No  |                                           | 0.00                | 0.00 |
| Plastic bag    | Yes | Plastic and Glass                         | Mother or housemaid |      |
| Mixed methods  | Yes | Battery and electronic waste              | Father              |      |
| Plastic bag    | Yes | Plastic and Glass                         | Mother or housemaid |      |
| Open container | No  |                                           | 0.00                | 0.00 |
| Plastic bag    | Yes | Plastic and Glass                         | Mother or housemaid |      |
| Plastic bag    | No  |                                           | 0.00                | 0.00 |
| Plastic bag    | Yes | Plastic and Glass                         | Children            |      |
| Plastic bag    | Yes | Battery and electronic waste              | Father              |      |
| Plastic bag    | Yes | Plastic and Glass                         | Mother or housemaid |      |
| Plastic bag    | Yes | Plastic and Glass                         | Mother or housemaid |      |
| Plastic bag    | Yes | Plastic and Glass                         | Mother or housemaid |      |
| Plastic bag    | Yes | Battery and electronic waste              | Father              |      |
| Plastic bag    | No  |                                           | 0.00                | 0.00 |
| Plastic bag    | Yes | Plastic and Glass                         | Mother or housemaid |      |
| Plastic bag    | No  |                                           | 0.00                | 0.00 |
| Basket         | Yes | Paper, Plastic, Glass, Textile, and Metal | Mother or housemaid |      |
| Mixed methods  | No  |                                           | 0.00                | 0.00 |
| box            | Yes | Plastic and Glass                         | Mother or housemaid |      |
| Plastic bag    | No  |                                           | 0.00                | 0.00 |
| Plastic bag    | No  |                                           | 0.00                | 0.00 |
| Plastic bag    | No  |                                           | 0.00                | 0.00 |
| Plastic bag    | Yes | Plastic and Glass                         | Mother or housemaid |      |
| Plastic bag    | No  |                                           | 0.00                | 0.00 |
| Plastic bag    | Yes | Plastic and Glass                         | Mother or housemaid |      |
| Basket         | No  |                                           | 0.00                | 0.00 |
| Plastic bag    | No  |                                           | 0.00                | 0.00 |
| Plastic bag    | No  |                                           | 0.00                | 0.00 |
| Basket         | Yes | Paper, Plastic, Glass, Textile, and Metal | Mother or housemaid |      |
| Plastic bag    | Yes | Plastic and Glass                         | Children            |      |
| Open container | Yes | Plastic and Glass                         | Mother or housemaid |      |
| Plastic bag    | No  |                                           | 0.00                | 0.00 |
| Plastic bag    | Yes | Plastic and Glass                         | Mother or housemaid |      |
| Plastic bag    | No  |                                           | 0.00                | 0.00 |
| Plastic bag    | Yes | Paper, Plastic, Glass, Textile, and Metal | Mother or housemaid |      |
| Mixed methods  | Yes | Plastic and Glass                         | Mother or housemaid |      |
| box            | No  |                                           | 0.00                | 0.00 |
| Mixed methods  | Yes | Paper, Plastic, Glass, Textile, and Metal | Mother or housemaid |      |
| Plastic bag    | Yes | Plastic and Glass                         | Children            |      |
| Mixed methods  | Yes | Paper, Plastic, Glass, Textile, and Metal | Mother or housemaid |      |
| Plastic bag    | No  |                                           | 0.00                | 0.00 |
| Open container | Yes | Plastic and Glass                         | Mother or housemaid |      |
| Plastic bag    | No  |                                           | 0.00                | 0.00 |
| Mixed methods  | Yes | Paper, Plastic, Glass, Textile, and Metal | Mother or housemaid |      |
| Plastic bag    | Yes | Plastic and Glass                         | Mother or housemaid |      |
| Plastic bag    | Yes | Paper, Plastic, Glass, Textile, and Metal | Mother or housemaid |      |
| Mixed methods  | Yes | Plastic and Glass                         | Children            |      |

|                |     |                                           |                     |      |
|----------------|-----|-------------------------------------------|---------------------|------|
| Plastic bag    | Yes | Paper, Plastic, Glass, Textile, and Metal | Mother or housemaid |      |
| Plastic bag    | No  |                                           |                     | 0.00 |
| Open container | No  |                                           |                     | 0.00 |
| Mixed methods  | No  |                                           |                     | 0.00 |
| Open container | Yes | Plastic and Glass                         | Mother or housemaid |      |
| Plastic bag    | Yes | Paper, Plastic, Glass, Textile, and Metal | All family member   |      |
| Plastic bag    | Yes | Plastic and Glass                         | Mother or housemaid |      |
| Plastic bag    | Yes | Paper, Plastic, Glass, Textile, and Metal | Mother or housemaid |      |
| Plastic bag    | Yes | Plastic and Glass                         | Mother or housemaid |      |
| Plastic bag    | Yes | Paper, Plastic, Glass, Textile, and Metal | Mother or housemaid |      |
| Plastic bag    | Yes | Plastic and Glass                         | Mother or housemaid |      |
| Plastic bag    | Yes | Paper, Plastic, Glass, Textile, and Metal | All family member   |      |
| Plastic bag    | Yes | Plastic and Glass                         | Mother or housemaid |      |

| Dealing with recyclables                          | Reasons for not recycle        |      |
|---------------------------------------------------|--------------------------------|------|
| Sell                                              |                                | 0.00 |
| mix the recyclable materials with other materials | No enough recyclable materials |      |
| Own use                                           |                                | 0.00 |
| Own use                                           |                                | 0.00 |
| Sell                                              |                                | 0.00 |
| Sell                                              |                                | 0.00 |
| Own use                                           |                                | 0.00 |
| Sell                                              |                                | 0.00 |
| mix the recyclable materials with other materials | Not taking an interest         |      |
| Sell                                              |                                | 0.00 |
| Own use                                           |                                | 0.00 |
| Sell                                              |                                | 0.00 |
| mix the recyclable materials with other materials | Having no time                 |      |
| Own use                                           |                                | 0.00 |
| mix the recyclable materials with other materials | Not taking an interest         |      |
| mix the recyclable materials with other materials | Having no time                 |      |
| mix the recyclable materials with other materials | No enough recyclable materials |      |
| Sell                                              |                                | 0.00 |
| Give away                                         |                                | 0.00 |
| Own use                                           |                                | 0.00 |
| mix the recyclable materials with other materials | Not taking an interest         |      |
| mix the recyclable materials with other materials | Having no time                 |      |
| Give away                                         |                                | 0.00 |
| Sell                                              |                                | 0.00 |
| Own use                                           |                                | 0.00 |
| Sell                                              |                                | 0.00 |
| Give away                                         |                                | 0.00 |
| Own use                                           |                                | 0.00 |
| Give away                                         |                                | 0.00 |
| Sell                                              |                                | 0.00 |
| Own use                                           |                                | 0.00 |
| mix the recyclable materials with other materials | Not taking an interest         |      |
| mix the recyclable materials with other materials | Having no time                 |      |
| Own use                                           |                                | 0.00 |
| mix the recyclable materials with other materials | Lack of awareness              |      |
| Sell                                              |                                | 0.00 |
| Own use                                           |                                | 0.00 |
| mix the recyclable materials with other materials | Not taking an interest         |      |
| mix the recyclable materials with other materials | Lack of awareness              |      |
| Own use                                           |                                | 0.00 |
| mix the recyclable materials with other materials | Lack of awareness              |      |
| mix the recyclable materials with other materials | Not taking an interest         |      |
| Sell                                              |                                | 0.00 |
| Give away                                         |                                | 0.00 |
| Own use                                           |                                | 0.00 |
| Sell                                              |                                | 0.00 |
| Own use                                           |                                | 0.00 |

|                                                   |                                |      |
|---------------------------------------------------|--------------------------------|------|
| Sell                                              |                                | 0.00 |
| mix the recyclable materials with other materials | Having no time                 |      |
| Own use                                           |                                | 0.00 |
| mix the recyclable materials with other materials | Having no time                 |      |
| Give away                                         |                                | 0.00 |
| Own use                                           |                                | 0.00 |
| Own use                                           |                                | 0.00 |
| Sell                                              |                                | 0.00 |
| Own use                                           |                                | 0.00 |
| mix the recyclable materials with other materials | Having no time                 |      |
| mix the recyclable materials with other materials | Not taking an interest         |      |
| mix the recyclable materials with other materials | Lack of awareness              |      |
| Sell                                              |                                | 0.00 |
| Own use                                           |                                | 0.00 |
| Sell                                              |                                | 0.00 |
| Give away                                         |                                | 0.00 |
| Own use                                           |                                | 0.00 |
| Own use                                           |                                | 0.00 |
| Own use                                           |                                | 0.00 |
| Own use                                           |                                | 0.00 |
| Own use                                           |                                | 0.00 |
| mix the recyclable materials with other materials | Not taking an interest         |      |
| mix the recyclable materials with other materials | Lack of awareness              |      |
| Own use                                           |                                | 0.00 |
| Give away                                         |                                | 0.00 |
| mix the recyclable materials with other materials | Lack of awareness              |      |
| mix the recyclable materials with other materials | Not taking an interest         |      |
| Own use                                           |                                | 0.00 |
| Own use                                           |                                | 0.00 |
| Own use                                           |                                | 0.00 |
| Own use                                           |                                | 0.00 |
| mix the recyclable materials with other materials | No enough recyclable materials |      |
| Own use                                           |                                | 0.00 |
| mix the recyclable materials with other materials | Not taking an interest         |      |
| mix the recyclable materials with other materials | Having no time                 |      |
| mix the recyclable materials with other materials | No enough recyclable materials |      |
| Own use                                           |                                | 0.00 |
| Own use                                           |                                | 0.00 |
| Sell                                              |                                | 0.00 |
| Own use                                           |                                | 0.00 |
| Sell                                              |                                | 0.00 |
| Own use                                           |                                | 0.00 |
| Own use                                           |                                | 0.00 |
| Own use                                           |                                | 0.00 |
| Own use                                           |                                | 0.00 |
| mix the recyclable materials with other materials | No enough recyclable materials |      |
| Sell                                              |                                | 0.00 |
| Own use                                           |                                | 0.00 |



|                                                   |                                |      |
|---------------------------------------------------|--------------------------------|------|
| Sell                                              |                                | 0.00 |
| mix the recyclable materials with other materials | Not taking an interest         |      |
| Own use                                           |                                | 0.00 |
| mix the recyclable materials with other materials | Lack of awareness              |      |
| mix the recyclable materials with other materials | Having no time                 |      |
| mix the recyclable materials with other materials | No enough recyclable materials |      |
| Sell                                              |                                | 0.00 |
| Own use                                           |                                | 0.00 |
| Own use                                           |                                | 0.00 |
| mix the recyclable materials with other materials | Not taking an interest         |      |
| mix the recyclable materials with other materials | Having no time                 |      |
| Sell                                              |                                | 0.00 |
| Sell                                              |                                | 0.00 |
| Own use                                           |                                | 0.00 |
| Sell                                              |                                | 0.00 |
| Own use                                           |                                | 0.00 |
| Own use                                           |                                | 0.00 |
| Own use                                           |                                | 0.00 |
| mix the recyclable materials with other materials | Not taking an interest         |      |
| Own use                                           |                                | 0.00 |
| mix the recyclable materials with other materials | Lack of awareness              |      |
| Give away                                         |                                | 0.00 |
| Sell                                              |                                | 0.00 |
| Give away                                         |                                | 0.00 |
| Give away                                         |                                | 0.00 |
| Own use                                           |                                | 0.00 |
| mix the recyclable materials with other materials | Not taking an interest         |      |
| mix the recyclable materials with other materials | Lack of awareness              |      |
| mix the recyclable materials with other materials | Lack of awareness              |      |
| Own use                                           |                                | 0.00 |
| Give away                                         |                                | 0.00 |
| Sell                                              |                                | 0.00 |
| Own use                                           |                                | 0.00 |
| Give away                                         |                                | 0.00 |
| Give away                                         |                                | 0.00 |
| Own use                                           |                                | 0.00 |
| Own use                                           |                                | 0.00 |
| Own use                                           |                                | 0.00 |
| mix the recyclable materials with other materials | Not taking an interest         |      |
| mix the recyclable materials with other materials | Lack of awareness              |      |
| Sell                                              |                                | 0.00 |
| Own use                                           |                                | 0.00 |
| Sell                                              |                                | 0.00 |
| mix the recyclable materials with other materials | Lack of awareness              |      |
| Own use                                           |                                | 0.00 |
| mix the recyclable materials with other materials | Not taking an interest         |      |
| Own use                                           |                                | 0.00 |
| Sell                                              |                                | 0.00 |

|                                                   |                                |      |
|---------------------------------------------------|--------------------------------|------|
| Sell                                              |                                | 0.00 |
| mix the recyclable materials with other materials | Lack of awareness              |      |
| mix the recyclable materials with other materials | Lack of awareness              |      |
| Give away                                         |                                | 0.00 |
| Give away                                         |                                | 0.00 |
| Give away                                         |                                | 0.00 |
| Own use                                           |                                | 0.00 |
| Sell                                              |                                | 0.00 |
| mix the recyclable materials with other materials | Having no time                 |      |
| Give away                                         |                                | 0.00 |
| mix the recyclable materials with other materials | Having no time                 |      |
| mix the recyclable materials with other materials | Not taking an interest         |      |
| mix the recyclable materials with other materials | No enough recyclable materials |      |
| Own use                                           |                                | 0.00 |
| Give away                                         |                                | 0.00 |
| Sell                                              |                                | 0.00 |
| Sell                                              |                                | 0.00 |
| Give away                                         |                                | 0.00 |
| Own use                                           |                                | 0.00 |
| Give away                                         |                                | 0.00 |
| mix the recyclable materials with other materials | Not taking an interest         |      |
| Own use                                           |                                | 0.00 |
| Own use                                           |                                | 0.00 |
| Sell                                              |                                | 0.00 |
| Own use                                           |                                | 0.00 |
| Give away                                         |                                | 0.00 |
| Own use                                           |                                | 0.00 |
| mix the recyclable materials with other materials | No enough recyclable materials |      |
| Own use                                           |                                | 0.00 |
| Own use                                           |                                | 0.00 |
| Own use                                           |                                | 0.00 |
| mix the recyclable materials with other materials | Not taking an interest         |      |
| Give away                                         |                                | 0.00 |
| mix the recyclable materials with other materials | Having no time                 |      |
| mix the recyclable materials with other materials | Lack of awareness              |      |
| mix the recyclable materials with other materials | Lack of awareness              |      |
| Own use                                           |                                | 0.00 |
| Sell                                              |                                | 0.00 |
| Own use                                           |                                | 0.00 |
| mix the recyclable materials with other materials | Not taking an interest         |      |
| mix the recyclable materials with other materials | Having no time                 |      |
| Give away                                         |                                | 0.00 |
| mix the recyclable materials with other materials | Lack of awareness              |      |
| Give away                                         |                                | 0.00 |
| mix the recyclable materials with other materials | Having no time                 |      |
| mix the recyclable materials with other materials | Not taking an interest         |      |
| Give away                                         |                                | 0.00 |
| Sell                                              |                                | 0.00 |

|                                                   |                                |      |
|---------------------------------------------------|--------------------------------|------|
| Give away                                         |                                | 0.00 |
| mix the recyclable materials with other materials | No enough recyclable materials |      |
| mix the recyclable materials with other materials | Lack of awareness              |      |
| Own use                                           |                                | 0.00 |
| mix the recyclable materials with other materials | Lack of awareness              |      |
| Give away                                         |                                | 0.00 |
| Own use                                           |                                | 0.00 |
| Give away                                         |                                | 0.00 |
| mix the recyclable materials with other materials | Lack of awareness              |      |
| Own use                                           |                                | 0.00 |
| mix the recyclable materials with other materials | Lack of awareness              |      |
| mix the recyclable materials with other materials | Not taking an interest         |      |
| mix the recyclable materials with other materials | No enough recyclable materials |      |
| Sell                                              |                                | 0.00 |
| Give away                                         |                                | 0.00 |
| Own use                                           |                                | 0.00 |
| Sell                                              |                                | 0.00 |
| Own use                                           |                                | 0.00 |
| Own use                                           |                                | 0.00 |
| mix the recyclable materials with other materials | Lack of awareness              |      |
| Own use                                           |                                | 0.00 |
| Own use                                           |                                | 0.00 |
| mix the recyclable materials with other materials | Lack of awareness              |      |
| mix the recyclable materials with other materials | Lack of awareness              |      |
| Own use                                           |                                | 0.00 |
| Sell                                              |                                | 0.00 |
| mix the recyclable materials with other materials | Not taking an interest         |      |
| mix the recyclable materials with other materials | Lack of awareness              |      |
| Own use                                           |                                | 0.00 |
| mix the recyclable materials with other materials | Lack of awareness              |      |
| Own use                                           |                                | 0.00 |
| Own use                                           |                                | 0.00 |
| Sell                                              |                                | 0.00 |
| mix the recyclable materials with other materials | Not taking an interest         |      |
| Give away                                         |                                | 0.00 |
| mix the recyclable materials with other materials | Lack of awareness              |      |
| mix the recyclable materials with other materials | Having no time                 |      |
| mix the recyclable materials with other materials | Lack of awareness              |      |
| Give away                                         |                                | 0.00 |
| mix the recyclable materials with other materials | Lack of awareness              |      |
| Own use                                           |                                | 0.00 |
| mix the recyclable materials with other materials | Lack of awareness              |      |
| mix the recyclable materials with other materials | Having no time                 |      |
| mix the recyclable materials with other materials | Not taking an interest         |      |
| Own use                                           |                                | 0.00 |
| mix the recyclable materials with other materials | Lack of awareness              |      |
| Own use                                           |                                | 0.00 |
| mix the recyclable materials with other materials | Lack of awareness              |      |

|                                                   |                                |      |
|---------------------------------------------------|--------------------------------|------|
| Own use                                           |                                | 0.00 |
| mix the recyclable materials with other materials | Not taking an interest         |      |
| Own use                                           |                                | 0.00 |
| Own use                                           |                                | 0.00 |
| Sell                                              |                                | 0.00 |
| mix the recyclable materials with other materials | Having no time                 |      |
| Sell                                              |                                | 0.00 |
| mix the recyclable materials with other materials | Lack of awareness              |      |
| Sell                                              |                                | 0.00 |
| Sell                                              |                                | 0.00 |
| Own use                                           |                                | 0.00 |
| Own use                                           |                                | 0.00 |
| Sell                                              |                                | 0.00 |
| Sell                                              |                                | 0.00 |
| mix the recyclable materials with other materials | Not taking an interest         |      |
| Give away                                         |                                | 0.00 |
| mix the recyclable materials with other materials | Lack of awareness              |      |
| Sell                                              |                                | 0.00 |
| mix the recyclable materials with other materials | Having no time                 |      |
| Sell                                              |                                | 0.00 |
| mix the recyclable materials with other materials | Lack of awareness              |      |
| mix the recyclable materials with other materials | Having no time                 |      |
| mix the recyclable materials with other materials | Lack of awareness              |      |
| Own use                                           |                                | 0.00 |
| mix the recyclable materials with other materials | Lack of awareness              |      |
| Sell                                              |                                | 0.00 |
| mix the recyclable materials with other materials | Lack of awareness              |      |
| mix the recyclable materials with other materials | Having no time                 |      |
| mix the recyclable materials with other materials | Lack of awareness              |      |
| Give away                                         |                                | 0.00 |
| Give away                                         |                                | 0.00 |
| Give away                                         |                                | 0.00 |
| mix the recyclable materials with other materials | No enough recyclable materials |      |
| Give away                                         |                                | 0.00 |
| mix the recyclable materials with other materials | Not taking an interest         |      |
| Give away                                         |                                | 0.00 |
| Own use                                           |                                | 0.00 |
| mix the recyclable materials with other materials | Not taking an interest         |      |
| Give away                                         |                                | 0.00 |
| Give away                                         |                                | 0.00 |
| Sell                                              |                                | 0.00 |
| mix the recyclable materials with other materials | Lack of awareness              |      |
| Sell                                              |                                | 0.00 |
| mix the recyclable materials with other materials | Lack of awareness              |      |
| Give away                                         |                                | 0.00 |
| Own use                                           |                                | 0.00 |
| Give away                                         |                                | 0.00 |
| Give away                                         |                                | 0.00 |

|                                                   |                        |      |
|---------------------------------------------------|------------------------|------|
| Sell                                              |                        | 0.00 |
| mix the recyclable materials with other materials | Not taking an interest |      |
| mix the recyclable materials with other materials | Lack of awareness      |      |
| mix the recyclable materials with other materials | Lack of awareness      |      |
| Own use                                           |                        | 0.00 |
| Sell                                              |                        | 0.00 |
| Own use                                           |                        | 0.00 |
| Own use                                           |                        | 0.00 |
| Give away                                         |                        | 0.00 |
| Give away                                         |                        | 0.00 |
| Own use                                           |                        | 0.00 |
| Sell                                              |                        | 0.00 |
| Own use                                           |                        | 0.00 |

| Reasons for not compost          | Availability of collection service | Frequency of collection service |
|----------------------------------|------------------------------------|---------------------------------|
| No time for these practices      | No                                 | No service                      |
| Do not know how to compost       | Yes                                | three times per week            |
| No land available                | Yes                                | three times per week            |
| No time for these practices      | No                                 | No service                      |
| No land available                | No                                 | No service                      |
| No land available                | No                                 | No service                      |
| No time for these practices      | No                                 | No service                      |
| No land available                | Yes                                | every week                      |
| Do not know how to compost       | Yes                                | three times per week            |
| No time for these practices      | Yes                                | three times per week            |
| No land available                | Yes                                | every week                      |
| No land available                | No                                 | No service                      |
| Do not know how to compost       | No                                 | No service                      |
| dirty and unhealthy              | No                                 | No service                      |
| No land available                | Yes                                | every week                      |
| No time for these practices      | Yes                                | three times per week            |
| No land available                | Yes                                | three times per week            |
| Do not know how to compost       | Yes                                | three times per week            |
| No land available                | Yes                                | every week                      |
| dirty and unhealthy              | Yes                                | three times per week            |
| No practical purpose for compost | Yes                                | three times per week            |
| Do not know how to compost       | Yes                                | every week                      |
| No practical purpose for compost | Yes                                | every week                      |
| No practical purpose for compost | Yes                                | three times per week            |
| No time for these practices      | No                                 | No service                      |
| No land available                | Yes                                | every week                      |
| No land available                | Yes                                | three times per week            |
| No land available                | Yes                                | three times per week            |
| dirty and unhealthy              | Yes                                | three times per week            |
| No land available                | No                                 | No service                      |
| Do not know how to compost       | Yes                                | every week                      |
| No land available                | Yes                                | three times per week            |
| No land available                | Yes                                | three times per week            |
| dirty and unhealthy              | Yes                                | every week                      |
| No land available                | Yes                                | twice per week                  |
| No land available                | Yes                                | twice per week                  |
| No time for these practices      | No                                 | No service                      |
| No land available                | Yes                                | three times per week            |
| No practical purpose for compost | Yes                                | three times per week            |
| Do not know how to compost       | Yes                                | three times per week            |
| No land available                | Yes                                | three times per week            |
| No land available                | Yes                                | three times per week            |
| dirty and unhealthy              | Yes                                | every week                      |
| No land available                | Yes                                | twice per week                  |
| No land available                | Yes                                | every day                       |
| No land available                | Yes                                | twice per week                  |
| Do not know how to compost       | No                                 | No service                      |

|                                  |     |                      |
|----------------------------------|-----|----------------------|
| No land available                | Yes | every day            |
| No land available                | Yes | three times per week |
| dirty and unhealthy              | Yes | twice per week       |
| No time for these practices      | Yes | every day            |
| No land available                | No  | No service           |
| No land available                | No  | No service           |
| No land available                | Yes | every day            |
| No land available                | Yes | three times per week |
| dirty and unhealthy              | Yes | every day            |
| No land available                | Yes | three times per week |
| No practical purpose for compost | No  | No service           |
| No practical purpose for compost | Yes | twice per week       |
| No practical purpose for compost | Yes | three times per week |
| No practical purpose for compost | Yes | three times per week |
| dirty and unhealthy              | Yes | three times per week |
| dirty and unhealthy              | Yes | twice per week       |
| dirty and unhealthy              | No  | No service           |
| No land available                | Yes | three times per week |
| No land available                | Yes | three times per week |
| No land available                | Yes | three times per week |
| No land available                | Yes | three times per week |
| dirty and unhealthy              | Yes | every day            |
| No land available                | Yes | three times per week |
| No land available                | Yes | twice per week       |
| dirty and unhealthy              | Yes | twice per week       |
| No land available                | Yes | three times per week |
| No time for these practices      | Yes | three times per week |
| No land available                | Yes | three times per week |
| No land available                | Yes | three times per week |
| Do not know how to compost       | No  | No service           |
| No land available                | Yes | three times per week |
| No land available                | Yes | three times per week |
| Do not know how to compost       | Yes | three times per week |
| No land available                | No  | No service           |
| No land available                | Yes | three times per week |
| dirty and unhealthy              | No  | No service           |
| No land available                | No  | No service           |
| No land available                | Yes | every week           |
| No land available                | Yes | every week           |
| No land available                | Yes | every week           |
| No land available                | Yes | three times per week |
| No land available                | Yes | three times per week |
| No time for these practices      | Yes | three times per week |
| No land available                | Yes | three times per week |
| Do not know how to compost       | Yes | three times per week |
| No land available                | Yes | every week           |
| dirty and unhealthy              | Yes | twice per week       |
| No practical purpose for compost | No  | No service           |

|                                  |     |                      |
|----------------------------------|-----|----------------------|
| No land available                | No  | No service           |
| No practical purpose for compost | Yes | every week           |
| dirty and unhealthy              | Yes | twice per week       |
| No land available                | Yes | three times per week |
| Do not know how to compost       | Yes | three times per week |
| No land available                | Yes | three times per week |
| No land available                | Yes | three times per week |
| No land available                | Yes | every day            |
| dirty and unhealthy              | Yes | three times per week |
| dirty and unhealthy              | No  | No service           |
| No land available                | Yes | twice per week       |
| No land available                | No  | No service           |
| No time for these practices      | Yes | every week           |
| No land available                | Yes | three times per week |
| dirty and unhealthy              | Yes | three times per week |
| No land available                | No  | No service           |
| No land available                | Yes | every day            |
| No land available                | Yes | every day            |
| dirty and unhealthy              | Yes | every day            |
| No land available                | No  | No service           |
| dirty and unhealthy              | Yes | every day            |
| No land available                | Yes | three times per week |
| No practical purpose for compost | Yes | three times per week |
| dirty and unhealthy              | Yes | three times per week |
| No land available                | Yes | twice per week       |
| No time for these practices      | Yes | twice per week       |
| No practical purpose for compost | Yes | three times per week |
| No land available                | No  | No service           |
| Do not know how to compost       | Yes | every day            |
| No land available                | Yes | three times per week |
| No time for these practices      | Yes | three times per week |
| dirty and unhealthy              | Yes | twice per week       |
| No practical purpose for compost | No  | No service           |
| No practical purpose for compost | Yes | twice per week       |
| No land available                | Yes | twice per week       |
| dirty and unhealthy              | No  | No service           |
| dirty and unhealthy              | No  | No service           |
| No land available                | Yes | three times per week |
| No land available                | Yes | three times per week |
| No time for these practices      | Yes | three times per week |
| No land available                | Yes | three times per week |
| dirty and unhealthy              | Yes | three times per week |
| No land available                | Yes | twice per week       |
| Do not know how to compost       | Yes | twice per week       |
| dirty and unhealthy              | Yes | twice per week       |
| No land available                | Yes | every day            |
| No land available                | Yes | three times per week |
| dirty and unhealthy              | Yes | three times per week |



|                                  |     |                      |
|----------------------------------|-----|----------------------|
| No land available                | Yes | three times per week |
| No land available                | Yes | three times per week |
| No land available                | Yes | twice per week       |
| No land available                | Yes | twice per week       |
| No time for these practices      | Yes | three times per week |
| No land available                | Yes | three times per week |
| No practical purpose for compost | Yes | three times per week |
| No practical purpose for compost | Yes | three times per week |
| No practical purpose for compost | No  | No service           |
| No land available                | Yes | every day            |
| No land available                | No  | No service           |
| No land available                | Yes | three times per week |
| No land available                | Yes | three times per week |
| No land available                | Yes | three times per week |
| No land available                | Yes | three times per week |
| No land available                | Yes | three times per week |
| No land available                | Yes | three times per week |
| No practical purpose for compost | Yes | three times per week |
| No land available                | Yes | three times per week |
| Do not know how to compost       | Yes | three times per week |
| Do not know how to compost       | No  | No service           |
| No land available                | No  | No service           |
| No practical purpose for compost | No  | No service           |
| No land available                | Yes | every week           |
| No time for these practices      | Yes | every day            |
| No land available                | Yes | three times per week |
| Do not know how to compost       | Yes | three times per week |
| No practical purpose for compost | Yes | twice per week       |
| No practical purpose for compost | No  | No service           |
| Do not know how to compost       | Yes | twice per week       |
| No land available                | Yes | three times per week |
| No land available                | Yes | three times per week |
| No land available                | Yes | three times per week |
| Do not know how to compost       | Yes | three times per week |
| No land available                | Yes | every week           |
| Do not know how to compost       | Yes | twice per week       |
| No land available                | No  | No service           |
| No land available                | Yes | every day            |
| No time for these practices      | Yes | three times per week |
| No land available                | Yes | three times per week |
| Do not know how to compost       | Yes | three times per week |
| No land available                | Yes | three times per week |
| No land available                | Yes | three times per week |
| Do not know how to compost       | Yes | twice per week       |
| No land available                | No  | No service           |
| Do not know how to compost       | Yes | twice per week       |
| No practical purpose for compost | Yes | every day            |
| No practical purpose for compost | Yes | twice per week       |



|                                  |     |                      |
|----------------------------------|-----|----------------------|
| No land available                | Yes | three times per week |
| Do not know how to compost       | No  | No service           |
| No land available                | Yes | every day            |
| No land available                | Yes | three times per week |
| No land available                | Yes | three times per week |
| No land available                | Yes | three times per week |
| No land available                | Yes | three times per week |
| No time for these practices      | Yes | three times per week |
| No land available                | Yes | three times per week |
| No land available                | Yes | three times per week |
| No land available                | Yes | three times per week |
| No land available                | Yes | three times per week |
| No land available                | Yes | every week           |
| Do not know how to compost       | No  | No service           |
| No land available                | Yes | three times per week |
| No land available                | Yes | three times per week |
| No land available                | No  | No service           |
| No land available                | Yes | three times per week |
| No time for these practices      | Yes | three times per week |
| No land available                | Yes | three times per week |
| No land available                | Yes | three times per week |
| No land available                | Yes | three times per week |
| No land available                | Yes | every week           |
| Do not know how to compost       | Yes | every week           |
| No land available                | Yes | every day            |
| No time for these practices      | No  | No service           |
| No land available                | Yes | three times per week |
| No land available                | Yes | every day            |
| dirty and unhealthy              | Yes | three times per week |
| No land available                | Yes | three times per week |
| No land available                | Yes | three times per week |
| No land available                | Yes | every day            |
| No time for these practices      | Yes | every day            |
| No land available                | Yes | every day            |
| Do not know how to compost       | Yes | three times per week |
| No practical purpose for compost | Yes | three times per week |
| No land available                | Yes | three times per week |
| No land available                | Yes | three times per week |
| No practical purpose for compost | No  | No service           |
| No land available                | Yes | every day            |
| No land available                | Yes | twice per week       |
| No time for these practices      | Yes | twice per week       |
| No practical purpose for compost | Yes | three times per week |
| No practical purpose for compost | Yes | twice per week       |
| dirty and unhealthy              | Yes | three times per week |
| No land available                | Yes | twice per week       |
| No practical purpose for compost | Yes | twice per week       |
| No land available                | Yes | three times per week |
| No practical purpose for compost | Yes | three times per week |
| No practical purpose for compost | Yes | three times per week |

|                                  |     |                      |
|----------------------------------|-----|----------------------|
| dirty and unhealthy              | Yes | three times per week |
| No practical purpose for compost | No  | No service           |
| No practical purpose for compost | Yes | twice per week       |
| Do not know how to compost       | Yes | twice per week       |
| No land available                | Yes | three times per week |
| No practical purpose for compost | Yes | twice per week       |
| dirty and unhealthy              | Yes | three times per week |
| No practical purpose for compost | Yes | three times per week |
| No time for these practices      | Yes | three times per week |
| No practical purpose for compost | Yes | three times per week |
| No land available                | Yes | three times per week |
| No practical purpose for compost | Yes | three times per week |
| dirty and unhealthy              | No  | No service           |

| Alternative waste disposal way | waste management responsibility at house level | Organic | Plastic |
|--------------------------------|------------------------------------------------|---------|---------|
| Dumping on open spaces         | Mother                                         | 0.78048 | 0.08780 |
|                                | 0.00 Father                                    | 0.78835 | 0.08869 |
|                                | 0.00 Children                                  | 0.86796 | 0.09765 |
| Dumping on open spaces         | Mother                                         | 0.74160 | 0.08343 |
| Dumping on open spaces         | Mother                                         | 1.30114 | 0.14638 |
| Dumping on open spaces         | Mother                                         | 1.30371 | 0.14667 |
| Dumping on open spaces         | Mother                                         | 1.29857 | 0.14609 |
|                                | 0.00 Father                                    | 1.28829 | 0.14493 |
|                                | 0.00 Mother                                    | 1.27800 | 0.14378 |
|                                | 0.00 Children                                  | 1.28571 | 0.14464 |
|                                | 0.00 Mother                                    | 1.31657 | 0.14811 |
| Burning                        | Father                                         | 1.88743 | 0.21234 |
| Burning                        | Mother                                         | 1.86943 | 0.21031 |
| Dumping on open spaces         | Mother                                         | 1.86429 | 0.20973 |
|                                | 0.00 Mother                                    | 1.86943 | 0.21031 |
|                                | 0.00 Mother                                    | 1.86943 | 0.21031 |
|                                | 0.00 Mother                                    | 1.87200 | 0.21060 |
|                                | 0.00 Father                                    | 2.49171 | 0.28032 |
|                                | 0.00 Mother                                    | 2.53800 | 0.28553 |
|                                | 0.00 Mother                                    | 2.52257 | 0.28379 |
|                                | 0.00 Mother                                    | 2.50200 | 0.28148 |
|                                | 0.00 Mother                                    | 2.52514 | 0.28408 |
|                                | 0.00 Mother                                    | 2.50971 | 0.28234 |
|                                | 0.00 Father                                    | 2.52257 | 0.28379 |
| Dumping on open spaces         | Children                                       | 2.55343 | 0.28726 |
|                                | 0.00 Mother                                    | 2.52514 | 0.28408 |
|                                | 0.00 Father                                    | 2.53286 | 0.28495 |
|                                | 0.00 Housemaid                                 | 2.52000 | 0.28350 |
|                                | 0.00 Mother                                    | 2.49686 | 0.28090 |
| Burning                        | Mother                                         | 2.92886 | 0.32950 |
|                                | 0.00 Mother                                    | 2.85377 | 0.32105 |
|                                | 0.00 Mother                                    | 2.93503 | 0.33019 |
|                                | 0.00 Mother                                    | 2.89080 | 0.32522 |
|                                | 0.00 Mother                                    | 2.99211 | 0.33661 |
|                                | 0.00 Mother                                    | 3.04097 | 0.34211 |
|                                | 0.00 Mother                                    | 2.80851 | 0.31596 |
| Dumping on open spaces         | Mother                                         | 2.82806 | 0.31816 |
|                                | 0.00 Mother                                    | 2.96794 | 0.33389 |
|                                | 0.00 Mother                                    | 3.01629 | 0.33933 |
|                                | 0.00 Mother                                    | 2.91600 | 0.32805 |
|                                | 0.00 Mother                                    | 2.98440 | 0.33575 |
|                                | 0.00 Mother                                    | 2.80440 | 0.31550 |
|                                | 0.00 Mother                                    | 2.93863 | 0.33060 |
|                                | 0.00 Mother                                    | 2.96331 | 0.33337 |
|                                | 0.00 Housemaid                                 | 2.70771 | 0.30462 |
|                                | 0.00 Mother                                    | 2.74371 | 0.30867 |
| Dumping on open spaces         | Mother                                         | 2.85686 | 0.32140 |

|                        |                |         |         |
|------------------------|----------------|---------|---------|
|                        | 0.00 Father    | 2.68971 | 0.30259 |
|                        | 0.00 Mother    | 2.87229 | 0.32313 |
|                        | 0.00 Mother    | 2.75914 | 0.31040 |
|                        | 0.00 Mother    | 2.81314 | 0.31648 |
| Dumping on open spaces | Children       | 2.76943 | 0.31156 |
| Dumping on open spaces | Mother         | 2.85429 | 0.32111 |
|                        | 0.00 Mother    | 2.87743 | 0.32371 |
|                        | 0.00 Father    | 2.85943 | 0.32169 |
|                        | 0.00 Mother    | 3.00857 | 0.33846 |
|                        | 0.00 Mother    | 3.20451 | 0.36051 |
| Dumping on open spaces | Mother         | 3.15154 | 0.35455 |
|                        | 0.00 Mother    | 2.98311 | 0.33560 |
|                        | 0.00 Father    | 3.20914 | 0.36103 |
|                        | 0.00 Mother    | 3.24951 | 0.36557 |
|                        | 0.00 Children  | 3.20040 | 0.36005 |
|                        | 0.00 Mother    | 3.43826 | 0.38680 |
| Burning                | Mother         | 3.65143 | 0.41079 |
|                        | 0.00 Father    | 3.74451 | 0.42126 |
|                        | 0.00 Mother    | 3.48994 | 0.39262 |
|                        | 0.00 Children  | 3.42823 | 0.38568 |
|                        | 0.00 Father    | 3.83966 | 0.43196 |
|                        | 0.00 Mother    | 3.58766 | 0.40361 |
|                        | 0.00 Mother    | 3.85637 | 0.43384 |
|                        | 0.00 Mother    | 4.07057 | 0.45794 |
|                        | 0.00 Children  | 3.79286 | 0.42670 |
|                        | 0.00 Mother    | 4.13049 | 0.46468 |
|                        | 0.00 Mother    | 3.72909 | 0.41952 |
|                        | 0.00 Mother    | 2.35851 | 0.26533 |
|                        | 0.00 Father    | 0.76827 | 0.10280 |
| Dumping on open spaces | Mother         | 0.76827 | 0.10280 |
|                        | 0.00 Mother    | 0.80443 | 0.10764 |
|                        | 0.00 Mother    | 0.77182 | 0.10327 |
|                        | 0.00 Housemaid | 0.79647 | 0.10657 |
| Dumping on open spaces | Mother         | 1.28490 | 0.17192 |
|                        | 0.00 Mother    | 1.28490 | 0.17192 |
| Burning                | Mother         | 1.28490 | 0.17192 |
| Dumping on open spaces | Children       | 1.24843 | 0.16704 |
|                        | 0.00 Mother    | 1.24666 | 0.16681 |
|                        | 0.00 Mother    | 1.25569 | 0.16801 |
|                        | 0.00 Children  | 1.95676 | 0.26182 |
|                        | 0.00 Father    | 1.73179 | 0.23172 |
|                        | 0.00 Father    | 1.95676 | 0.26182 |
|                        | 0.00 Mother    | 1.71211 | 0.22909 |
|                        | 0.00 Mother    | 1.95625 | 0.26175 |
|                        | 0.00 Children  | 1.91330 | 0.25600 |
|                        | 0.00 Mother    | 1.90909 | 0.25544 |
|                        | 0.00 Mother    | 2.52567 | 0.33794 |
| Dumping on open spaces | Mother         | 2.50021 | 0.33454 |

|                        |                |         |         |
|------------------------|----------------|---------|---------|
| Dumping on open spaces | Father         | 2.51046 | 0.33591 |
|                        | 0.00 Mother    | 2.51249 | 0.33618 |
|                        | 0.00 Children  | 2.55159 | 0.34141 |
|                        | 0.00 Mother    | 2.51558 | 0.33659 |
|                        | 0.00 Mother    | 2.51036 | 0.33589 |
|                        | 0.00 Mother    | 2.52263 | 0.33754 |
|                        | 0.00 Mother    | 2.49347 | 0.33363 |
|                        | 0.00 Father    | 2.51543 | 0.33657 |
|                        | 0.00 Housemaid | 2.57187 | 0.34412 |
| Burying                | Mother         | 2.94990 | 0.39470 |
|                        | 0.00 Mother    | 2.94990 | 0.39470 |
| Dumping on open spaces | Children       | 3.03292 | 0.40581 |
|                        | 0.00 Father    | 3.03084 | 0.40553 |
|                        | 0.00 Children  | 3.02328 | 0.40452 |
|                        | 0.00 Mother    | 2.50158 | 0.33472 |
| Dumping on open spaces | Mother         | 3.02780 | 0.40513 |
|                        | 0.00 Housemaid | 3.03140 | 0.40561 |
|                        | 0.00 Mother    | 2.94990 | 0.39470 |
|                        | 0.00 Mother    | 2.52263 | 0.33754 |
| Dumping on open spaces | Mother         | 2.50539 | 0.33523 |
|                        | 0.00 Mother    | 2.49007 | 0.33318 |
|                        | 0.00 Children  | 2.55159 | 0.34141 |
|                        | 0.00 Father    | 3.39644 | 0.45445 |
|                        | 0.00 Children  | 3.40430 | 0.45550 |
|                        | 0.00 Mother    | 3.48610 | 0.46645 |
|                        | 0.00 Children  | 3.47342 | 0.46475 |
|                        | 0.00 Mother    | 3.49066 | 0.46706 |
| Dumping on open spaces | Mother         | 3.49371 | 0.46747 |
|                        | 0.00 Mother    | 3.51202 | 0.46992 |
|                        | 0.00 Father    | 3.52738 | 0.47197 |
|                        | 0.00 Mother    | 3.49112 | 0.46712 |
|                        | 0.00 Mother    | 3.47570 | 0.46506 |
| Dumping on open spaces | Children       | 3.49295 | 0.46737 |
|                        | 0.00 Mother    | 3.47063 | 0.46438 |
|                        | 0.00 Mother    | 3.49589 | 0.46776 |
| Dumping on open spaces | Mother         | 4.03584 | 0.54001 |
| Dumping on open spaces | Mother         | 4.03204 | 0.53950 |
|                        | 0.00 Mother    | 4.03305 | 0.53963 |
|                        | 0.00 Mother    | 4.03534 | 0.53994 |
|                        | 0.00 Mother    | 4.02950 | 0.53916 |
|                        | 0.00 Mother    | 4.03103 | 0.53936 |
|                        | 0.00 Mother    | 4.60359 | 0.61597 |
|                        | 0.00 Mother    | 4.60156 | 0.61570 |
|                        | 0.00 Mother    | 4.60258 | 0.61584 |
|                        | 0.00 Mother    | 4.60080 | 0.61560 |
|                        | 0.00 Mother    | 4.59649 | 0.61502 |
|                        | 0.00 Mother    | 4.59776 | 0.61519 |
|                        | 0.00 Mother    | 4.60283 | 0.61587 |

|                        |                |         |         |
|------------------------|----------------|---------|---------|
|                        | 0.00 Mother    | 4.98268 | 0.66670 |
|                        | 0.00 Mother    | 5.02776 | 0.67273 |
|                        | 0.00 Mother    | 4.97604 | 0.66581 |
|                        | 0.00 Mother    | 4.88490 | 0.65361 |
|                        | 0.00 Mother    | 4.98973 | 0.66764 |
|                        | 0.00 Mother    | 5.05931 | 0.67695 |
|                        | 0.00 Mother    | 4.99434 | 0.66826 |
|                        | 0.00 Children  | 0.71852 | 0.13093 |
| Dumping on open spaces | Mother         | 0.70867 | 0.12914 |
|                        | 0.00 Housemaid | 0.72779 | 0.13262 |
| Burning                | Mother         | 0.71259 | 0.12985 |
|                        | 0.00 Mother    | 0.78996 | 0.14395 |
|                        | 0.00 Mother    | 1.08478 | 0.19767 |
|                        | 0.00 Children  | 0.98163 | 0.17888 |
|                        | 0.00 Housemaid | 1.17564 | 0.21423 |
|                        | 0.00 Mother    | 1.17555 | 0.21421 |
|                        | 0.00 Mother    | 1.17722 | 0.21452 |
|                        | 0.00 Housemaid | 1.18406 | 0.21577 |
|                        | 0.00 Children  | 1.62019 | 0.29524 |
|                        | 0.00 Mother    | 1.61128 | 0.29362 |
| Burying                | Mother         | 1.58845 | 0.28946 |
| Dumping on open spaces | Mother         | 1.63204 | 0.29740 |
| Dumping on open spaces | Mother         | 1.61077 | 0.29352 |
|                        | 0.00 Father    | 1.61770 | 0.29479 |
|                        | 0.00 Housemaid | 1.60953 | 0.29330 |
|                        | 0.00 Mother    | 1.61378 | 0.29407 |
|                        | 0.00 Mother    | 1.60326 | 0.29216 |
|                        | 0.00 Mother    | 2.04202 | 0.37211 |
| Burning                | Mother         | 2.37873 | 0.43347 |
|                        | 0.00 Mother    | 2.34325 | 0.42700 |
|                        | 0.00 Housemaid | 2.32254 | 0.42323 |
|                        | 0.00 Mother    | 2.36247 | 0.43050 |
|                        | 0.00 Children  | 2.34325 | 0.42700 |
|                        | 0.00 Mother    | 2.32905 | 0.42441 |
|                        | 0.00 Mother    | 2.35482 | 0.42911 |
|                        | 0.00 Mother    | 2.34803 | 0.42787 |
| Dumping on open spaces | Mother         | 2.31107 | 0.42114 |
|                        | 0.00 Housemaid | 3.14412 | 0.57294 |
|                        | 0.00 Mother    | 3.29117 | 0.59973 |
|                        | 0.00 Mother    | 3.28328 | 0.59830 |
|                        | 0.00 Mother    | 3.29552 | 0.60053 |
|                        | 0.00 Children  | 3.29863 | 0.60109 |
|                        | 0.00 Mother    | 3.31575 | 0.60421 |
|                        | 0.00 Mother    | 2.93294 | 0.53446 |
| Dumping on open spaces | Mother         | 3.29490 | 0.60041 |
|                        | 0.00 Mother    | 2.90750 | 0.52982 |
|                        | 0.00 Housemaid | 3.29614 | 0.60064 |
|                        | 0.00 Mother    | 3.27548 | 0.59688 |



|                |         |         |
|----------------|---------|---------|
| 0.00 Mother    | 3.29858 | 0.60109 |
| 0.00 Mother    | 2.93294 | 0.53446 |
| 0.00 Mother    | 2.88669 | 0.52603 |
| 0.00 Mother    | 2.89984 | 0.52843 |
| 0.00 Mother    | 2.90750 | 0.52982 |
| 0.00 Mother    | 3.80563 | 0.69348 |
| 0.00 Mother    | 3.80204 | 0.69283 |
| 0.00 Mother    | 3.80300 | 0.69300 |
| 0.00 Mother    | 3.80515 | 0.69340 |
| 0.00 Children  | 3.79965 | 0.69239 |
| 0.00 Mother    | 3.80109 | 0.69266 |
| 0.00 Mother    | 3.57035 | 0.65061 |
| 0.00 Mother    | 3.33602 | 0.60791 |
| 0.00 Father    | 3.80204 | 0.69283 |
| 0.00 Mother    | 3.80300 | 0.69300 |
| 0.00 Mother    | 3.80515 | 0.69340 |
| 0.00 Mother    | 3.91815 | 0.71399 |
| 0.00 Mother    | 3.80563 | 0.69348 |
| 0.00 Mother    | 4.47154 | 0.81483 |
| 0.00 Mother    | 4.47250 | 0.81500 |
| 0.00 Mother    | 4.47465 | 0.81540 |
| 0.00 Mother    | 4.46915 | 0.81439 |
| 0.00 Mother    | 4.33430 | 0.78982 |
| 0.00 Mother    | 4.33549 | 0.79004 |
| 0.00 Father    | 4.34027 | 0.79091 |
| 0.00 Mother    | 5.00786 | 0.91256 |
| 0.00 Mother    | 5.00380 | 0.91182 |
| 0.00 Mother    | 5.00499 | 0.91204 |
| 0.00 Mother    | 5.00977 | 0.91291 |
| 0.00 Mother    | 4.74604 | 0.86485 |
| 0.00 Mother    | 5.45523 | 0.99408 |
| 0.00 Mother    | 5.42233 | 0.98809 |
| 0.00 Mother    | 5.44471 | 0.99217 |
| 0.00 Mother    | 5.37895 | 0.98018 |
| 0.00 Housemaid | 0.78023 | 0.14817 |
| 0.00 Children  | 0.75175 | 0.14276 |
| 0.00 Mother    | 0.71795 | 0.13634 |
| 0.00 Mother    | 0.76900 | 0.14603 |
| 0.00 Housemaid | 0.76544 | 0.14536 |
| 0.00 Mother    | 1.37046 | 0.26025 |
| 0.00 Mother    | 1.37250 | 0.26064 |
| 0.00 Mother    | 1.37648 | 0.26140 |
| 0.00 Mother    | 1.36719 | 0.25963 |
| 0.00 Mother    | 1.39900 | 0.26567 |
| 0.00 Children  | 1.20075 | 0.22802 |
| 0.00 Mother    | 1.78799 | 0.33954 |
| 0.00 Housemaid | 1.82861 | 0.34726 |
| 0.00 Mother    | 1.89486 | 0.35984 |

|                        |                |         |         |
|------------------------|----------------|---------|---------|
|                        | 0.00 Mother    | 1.83017 | 0.34755 |
| Dumping on open spaces | Mother         | 1.83695 | 0.34884 |
|                        | 0.00 Housemaid | 1.78406 | 0.33880 |
|                        | 0.00 Mother    | 1.89799 | 0.36043 |
|                        | 0.00 Mother    | 1.79292 | 0.34048 |
|                        | 0.00 Mother    | 1.82813 | 0.34717 |
|                        | 0.00 Mother    | 2.30173 | 0.43710 |
|                        | 0.00 Mother    | 2.35552 | 0.44732 |
|                        | 0.00 Children  | 2.75670 | 0.52350 |
|                        | 0.00 Children  | 2.33173 | 0.44280 |
|                        | 0.00 Mother    | 2.35742 | 0.44768 |
|                        | 0.00 Mother    | 2.33647 | 0.44370 |
| Dumping on open spaces | Mother         | 2.34135 | 0.44463 |
|                        | 0.00 Father    | 2.38448 | 0.45282 |
|                        | 0.00 Mother    | 2.33775 | 0.44394 |
| Dumping on open spaces | Mother         | 3.11594 | 0.59172 |
|                        | 0.00 Mother    | 3.26167 | 0.61940 |
|                        | 0.00 Mother    | 3.25385 | 0.61791 |
|                        | 0.00 Mother    | 3.26598 | 0.62022 |
|                        | 0.00 Mother    | 3.26906 | 0.62080 |
|                        | 0.00 Mother    | 3.28603 | 0.62402 |
|                        | 0.00 Mother    | 3.29802 | 0.62630 |
|                        | 0.00 Mother    | 3.26537 | 0.62010 |
| Burning                | Mother         | 3.25177 | 0.61752 |
|                        | 0.00 Mother    | 3.26660 | 0.62033 |
|                        | 0.00 Housemaid | 3.24613 | 0.61645 |
|                        | 0.00 Mother    | 3.26902 | 0.62079 |
|                        | 0.00 Mother    | 2.90665 | 0.55198 |
|                        | 0.00 Mother    | 2.86082 | 0.54328 |
|                        | 0.00 Mother    | 2.87386 | 0.54575 |
|                        | 0.00 Children  | 2.88144 | 0.54719 |
|                        | 0.00 Housemaid | 2.89859 | 0.55045 |
|                        | 0.00 Mother    | 3.58029 | 0.67991 |
|                        | 0.00 Mother    | 3.58195 | 0.68022 |
|                        | 0.00 Mother    | 3.55195 | 0.67452 |
|                        | 0.00 Mother    | 3.62233 | 0.68789 |
| Dumping on open spaces | Mother         | 3.50285 | 0.66520 |
|                        | 0.00 Mother    | 3.52252 | 0.66893 |
|                        | 0.00 Mother    | 3.49096 | 0.66294 |
|                        | 0.00 Children  | 3.30613 | 0.62784 |
|                        | 0.00 Housemaid | 3.55987 | 0.67603 |
|                        | 0.00 Mother    | 3.49451 | 0.66362 |
|                        | 0.00 Mother    | 3.63655 | 0.69059 |
|                        | 0.00 Mother    | 3.49975 | 0.66461 |
|                        | 0.00 Mother    | 3.54233 | 0.67270 |
|                        | 0.00 Mother    | 4.04645 | 0.76843 |
|                        | 0.00 Mother    | 4.05526 | 0.77010 |
|                        | 0.00 Children  | 4.03948 | 0.76711 |

|                        |                |         |         |
|------------------------|----------------|---------|---------|
|                        | 0.00 Housemaid | 4.17408 | 0.79267 |
| Dumping on open spaces | Mother         | 4.22934 | 0.80316 |
|                        | 0.00 Mother    | 4.21792 | 0.80099 |
|                        | 0.00 Mother    | 4.23029 | 0.80334 |
|                        | 0.00 Mother    | 4.29948 | 0.81648 |
|                        | 0.00 Mother    | 4.83094 | 0.91741 |
|                        | 0.00 Mother    | 4.88274 | 0.92724 |
|                        | 0.00 Mother    | 4.86564 | 0.92399 |
|                        | 0.00 Mother    | 4.71327 | 0.89506 |
|                        | 0.00 Mother    | 5.42293 | 1.02983 |
|                        | 0.00 Housemaid | 5.74501 | 1.09099 |
|                        | 0.00 Father    | 5.41961 | 1.02920 |
| Dumping on open spaces | Mother         | 5.44084 | 1.03323 |

| Inert   | Paper   | Textile | Metal   | Glass   | Wood    | Hazardous |
|---------|---------|---------|---------|---------|---------|-----------|
| 0.09756 | 0.03902 | 0.02818 | 0.01409 | 0.01192 | 0.00650 | 0.01734   |
| 0.09854 | 0.03942 | 0.02847 | 0.01423 | 0.01204 | 0.00657 | 0.01752   |
| 0.10850 | 0.04340 | 0.03134 | 0.01567 | 0.01326 | 0.00723 | 0.01929   |
| 0.09270 | 0.03708 | 0.02678 | 0.01339 | 0.01133 | 0.00618 | 0.01648   |
| 0.16264 | 0.06506 | 0.04699 | 0.02349 | 0.01988 | 0.01084 | 0.02891   |
| 0.16296 | 0.06519 | 0.04708 | 0.02354 | 0.01992 | 0.01086 | 0.02897   |
| 0.16232 | 0.06493 | 0.04689 | 0.02345 | 0.01984 | 0.01082 | 0.02886   |
| 0.16104 | 0.06441 | 0.04652 | 0.02326 | 0.01968 | 0.01074 | 0.02863   |
| 0.15975 | 0.06390 | 0.04615 | 0.02308 | 0.01953 | 0.01065 | 0.02840   |
| 0.16071 | 0.06429 | 0.04643 | 0.02321 | 0.01964 | 0.01071 | 0.02857   |
| 0.16457 | 0.06583 | 0.04754 | 0.02377 | 0.02011 | 0.01097 | 0.02926   |
| 0.23593 | 0.09437 | 0.06816 | 0.03408 | 0.02884 | 0.01573 | 0.04194   |
| 0.23368 | 0.09347 | 0.06751 | 0.03375 | 0.02856 | 0.01558 | 0.04154   |
| 0.23304 | 0.09321 | 0.06732 | 0.03366 | 0.02848 | 0.01554 | 0.04143   |
| 0.23368 | 0.09347 | 0.06751 | 0.03375 | 0.02856 | 0.01558 | 0.04154   |
| 0.23368 | 0.09347 | 0.06751 | 0.03375 | 0.02856 | 0.01558 | 0.04154   |
| 0.23400 | 0.09360 | 0.06760 | 0.03380 | 0.02860 | 0.01560 | 0.04160   |
| 0.31146 | 0.12459 | 0.08998 | 0.04499 | 0.03807 | 0.02076 | 0.05537   |
| 0.31725 | 0.12690 | 0.09165 | 0.04583 | 0.03878 | 0.02115 | 0.05640   |
| 0.31532 | 0.12613 | 0.09109 | 0.04555 | 0.03854 | 0.02102 | 0.05606   |
| 0.31275 | 0.12510 | 0.09035 | 0.04518 | 0.03823 | 0.02085 | 0.05560   |
| 0.31564 | 0.12626 | 0.09119 | 0.04559 | 0.03858 | 0.02104 | 0.05611   |
| 0.31371 | 0.12549 | 0.09063 | 0.04531 | 0.03834 | 0.02091 | 0.05577   |
| 0.31532 | 0.12613 | 0.09109 | 0.04555 | 0.03854 | 0.02102 | 0.05606   |
| 0.31918 | 0.12767 | 0.09221 | 0.04610 | 0.03901 | 0.02128 | 0.05674   |
| 0.31564 | 0.12626 | 0.09119 | 0.04559 | 0.03858 | 0.02104 | 0.05611   |
| 0.31661 | 0.12664 | 0.09146 | 0.04573 | 0.03870 | 0.02111 | 0.05629   |
| 0.31500 | 0.12600 | 0.09100 | 0.04550 | 0.03850 | 0.02100 | 0.05600   |
| 0.31211 | 0.12484 | 0.09016 | 0.04508 | 0.03815 | 0.02081 | 0.05549   |
| 0.36611 | 0.14644 | 0.10576 | 0.05288 | 0.04475 | 0.02441 | 0.06509   |
| 0.35672 | 0.14269 | 0.10305 | 0.05153 | 0.04360 | 0.02378 | 0.06342   |
| 0.36688 | 0.14675 | 0.10599 | 0.05299 | 0.04484 | 0.02446 | 0.06522   |
| 0.36135 | 0.14454 | 0.10439 | 0.05220 | 0.04417 | 0.02409 | 0.06424   |
| 0.37401 | 0.14961 | 0.10805 | 0.05402 | 0.04571 | 0.02493 | 0.06649   |
| 0.38012 | 0.15205 | 0.10981 | 0.05491 | 0.04646 | 0.02534 | 0.06758   |
| 0.35106 | 0.14043 | 0.10142 | 0.05071 | 0.04291 | 0.02340 | 0.06241   |
| 0.35351 | 0.14140 | 0.10212 | 0.05106 | 0.04321 | 0.02357 | 0.06285   |
| 0.37099 | 0.14840 | 0.10718 | 0.05359 | 0.04534 | 0.02473 | 0.06595   |
| 0.37704 | 0.15081 | 0.10892 | 0.05446 | 0.04608 | 0.02514 | 0.06703   |
| 0.36450 | 0.14580 | 0.10530 | 0.05265 | 0.04455 | 0.02430 | 0.06480   |
| 0.37305 | 0.14922 | 0.10777 | 0.05389 | 0.04560 | 0.02487 | 0.06632   |
| 0.35055 | 0.14022 | 0.10127 | 0.05064 | 0.04285 | 0.02337 | 0.06232   |
| 0.36733 | 0.14693 | 0.10612 | 0.05306 | 0.04490 | 0.02449 | 0.06530   |
| 0.37041 | 0.14817 | 0.10701 | 0.05350 | 0.04527 | 0.02469 | 0.06585   |
| 0.33846 | 0.13539 | 0.09778 | 0.04889 | 0.04137 | 0.02256 | 0.06017   |
| 0.34296 | 0.13719 | 0.09908 | 0.04954 | 0.04192 | 0.02286 | 0.06097   |
| 0.35711 | 0.14284 | 0.10316 | 0.05158 | 0.04365 | 0.02381 | 0.06349   |

|         |         |         |         |         |         |         |
|---------|---------|---------|---------|---------|---------|---------|
| 0.33621 | 0.13449 | 0.09713 | 0.04856 | 0.04109 | 0.02241 | 0.05977 |
| 0.35904 | 0.14361 | 0.10372 | 0.05186 | 0.04388 | 0.02394 | 0.06383 |
| 0.34489 | 0.13796 | 0.09964 | 0.04982 | 0.04215 | 0.02299 | 0.06131 |
| 0.35164 | 0.14066 | 0.10159 | 0.05079 | 0.04298 | 0.02344 | 0.06251 |
| 0.34618 | 0.13847 | 0.10001 | 0.05000 | 0.04231 | 0.02308 | 0.06154 |
| 0.35679 | 0.14271 | 0.10307 | 0.05154 | 0.04361 | 0.02379 | 0.06343 |
| 0.35968 | 0.14387 | 0.10391 | 0.05195 | 0.04396 | 0.02398 | 0.06394 |
| 0.35743 | 0.14297 | 0.10326 | 0.05163 | 0.04369 | 0.02383 | 0.06354 |
| 0.37607 | 0.15043 | 0.10864 | 0.05432 | 0.04596 | 0.02507 | 0.06686 |
| 0.40056 | 0.16023 | 0.11572 | 0.05786 | 0.04896 | 0.02670 | 0.07121 |
| 0.39394 | 0.15758 | 0.11381 | 0.05690 | 0.04815 | 0.02626 | 0.07003 |
| 0.37289 | 0.14916 | 0.10772 | 0.05386 | 0.04558 | 0.02486 | 0.06629 |
| 0.40114 | 0.16046 | 0.11589 | 0.05794 | 0.04903 | 0.02674 | 0.07131 |
| 0.40619 | 0.16248 | 0.11734 | 0.05867 | 0.04965 | 0.02708 | 0.07221 |
| 0.40005 | 0.16002 | 0.11557 | 0.05779 | 0.04890 | 0.02667 | 0.07112 |
| 0.42978 | 0.17191 | 0.12416 | 0.06208 | 0.05253 | 0.02865 | 0.07641 |
| 0.45643 | 0.18257 | 0.13186 | 0.06593 | 0.05579 | 0.03043 | 0.08114 |
| 0.46806 | 0.18723 | 0.13522 | 0.06761 | 0.05721 | 0.03120 | 0.08321 |
| 0.43624 | 0.17450 | 0.12603 | 0.06301 | 0.05332 | 0.02908 | 0.07755 |
| 0.42853 | 0.17141 | 0.12380 | 0.06190 | 0.05238 | 0.02857 | 0.07618 |
| 0.47996 | 0.19198 | 0.13865 | 0.06933 | 0.05866 | 0.03200 | 0.08533 |
| 0.44846 | 0.17938 | 0.12955 | 0.06478 | 0.05481 | 0.02990 | 0.07973 |
| 0.48205 | 0.19282 | 0.13926 | 0.06963 | 0.05892 | 0.03214 | 0.08570 |
| 0.50882 | 0.20353 | 0.14699 | 0.07350 | 0.06219 | 0.03392 | 0.09046 |
| 0.47411 | 0.18964 | 0.13696 | 0.06848 | 0.05795 | 0.03161 | 0.08429 |
| 0.51631 | 0.20652 | 0.14916 | 0.07458 | 0.06310 | 0.03442 | 0.09179 |
| 0.46614 | 0.18645 | 0.13466 | 0.06733 | 0.05697 | 0.03108 | 0.08287 |
| 0.29481 | 0.11793 | 0.08517 | 0.04258 | 0.03603 | 0.01965 | 0.05241 |
| 0.09414 | 0.04328 | 0.02597 | 0.01298 | 0.01190 | 0.00649 | 0.01731 |
| 0.09414 | 0.04328 | 0.02597 | 0.01298 | 0.01190 | 0.00649 | 0.01731 |
| 0.09857 | 0.04532 | 0.02719 | 0.01360 | 0.01246 | 0.00680 | 0.01813 |
| 0.09458 | 0.04348 | 0.02609 | 0.01304 | 0.01196 | 0.00652 | 0.01739 |
| 0.09760 | 0.04487 | 0.02692 | 0.01346 | 0.01234 | 0.00673 | 0.01795 |
| 0.15745 | 0.07239 | 0.04343 | 0.02172 | 0.01991 | 0.01086 | 0.02896 |
| 0.15745 | 0.07239 | 0.04343 | 0.02172 | 0.01991 | 0.01086 | 0.02896 |
| 0.15745 | 0.07239 | 0.04343 | 0.02172 | 0.01991 | 0.01086 | 0.02896 |
| 0.15298 | 0.07033 | 0.04220 | 0.02110 | 0.01934 | 0.01055 | 0.02813 |
| 0.15276 | 0.07023 | 0.04214 | 0.02107 | 0.01931 | 0.01054 | 0.02809 |
| 0.15387 | 0.07074 | 0.04245 | 0.02122 | 0.01945 | 0.01061 | 0.02830 |
| 0.23977 | 0.11024 | 0.06614 | 0.03307 | 0.03032 | 0.01654 | 0.04410 |
| 0.21221 | 0.09757 | 0.05854 | 0.02927 | 0.02683 | 0.01463 | 0.03903 |
| 0.23977 | 0.11024 | 0.06614 | 0.03307 | 0.03032 | 0.01654 | 0.04410 |
| 0.20979 | 0.09646 | 0.05787 | 0.02894 | 0.02653 | 0.01447 | 0.03858 |
| 0.23971 | 0.11021 | 0.06613 | 0.03306 | 0.03031 | 0.01653 | 0.04408 |
| 0.23445 | 0.10779 | 0.06467 | 0.03234 | 0.02964 | 0.01617 | 0.04312 |
| 0.23393 | 0.10755 | 0.06453 | 0.03227 | 0.02958 | 0.01613 | 0.04302 |
| 0.30948 | 0.14229 | 0.08537 | 0.04269 | 0.03913 | 0.02134 | 0.05692 |
| 0.30636 | 0.14086 | 0.08451 | 0.04226 | 0.03874 | 0.02113 | 0.05634 |

|         |         |         |         |         |         |         |
|---------|---------|---------|---------|---------|---------|---------|
| 0.30762 | 0.14143 | 0.08486 | 0.04243 | 0.03889 | 0.02122 | 0.05657 |
| 0.30787 | 0.14155 | 0.08493 | 0.04246 | 0.03893 | 0.02123 | 0.05662 |
| 0.31266 | 0.14375 | 0.08625 | 0.04313 | 0.03953 | 0.02156 | 0.05750 |
| 0.30825 | 0.14172 | 0.08503 | 0.04252 | 0.03897 | 0.02126 | 0.05669 |
| 0.30761 | 0.14143 | 0.08486 | 0.04243 | 0.03889 | 0.02121 | 0.05657 |
| 0.30911 | 0.14212 | 0.08527 | 0.04264 | 0.03908 | 0.02132 | 0.05685 |
| 0.30554 | 0.14048 | 0.08429 | 0.04214 | 0.03863 | 0.02107 | 0.05619 |
| 0.30823 | 0.14171 | 0.08503 | 0.04251 | 0.03897 | 0.02126 | 0.05669 |
| 0.31515 | 0.14489 | 0.08694 | 0.04347 | 0.03985 | 0.02173 | 0.05796 |
| 0.36147 | 0.16619 | 0.09971 | 0.04986 | 0.04570 | 0.02493 | 0.06648 |
| 0.36147 | 0.16619 | 0.09971 | 0.04986 | 0.04570 | 0.02493 | 0.06648 |
| 0.37164 | 0.17087 | 0.10252 | 0.05126 | 0.04699 | 0.02563 | 0.06835 |
| 0.37138 | 0.17075 | 0.10245 | 0.05123 | 0.04696 | 0.02561 | 0.06830 |
| 0.37046 | 0.17033 | 0.10220 | 0.05110 | 0.04684 | 0.02555 | 0.06813 |
| 0.30653 | 0.14093 | 0.08456 | 0.04228 | 0.03876 | 0.02114 | 0.05637 |
| 0.37101 | 0.17058 | 0.10235 | 0.05117 | 0.04691 | 0.02559 | 0.06823 |
| 0.37145 | 0.17078 | 0.10247 | 0.05123 | 0.04697 | 0.02562 | 0.06831 |
| 0.36147 | 0.16619 | 0.09971 | 0.04986 | 0.04570 | 0.02493 | 0.06648 |
| 0.30911 | 0.14212 | 0.08527 | 0.04264 | 0.03908 | 0.02132 | 0.05685 |
| 0.30700 | 0.14115 | 0.08469 | 0.04234 | 0.03882 | 0.02117 | 0.05646 |
| 0.30512 | 0.14029 | 0.08417 | 0.04209 | 0.03858 | 0.02104 | 0.05611 |
| 0.31266 | 0.14375 | 0.08625 | 0.04313 | 0.03953 | 0.02156 | 0.05750 |
| 0.41618 | 0.19135 | 0.11481 | 0.05740 | 0.05262 | 0.02870 | 0.07654 |
| 0.41715 | 0.19179 | 0.11507 | 0.05754 | 0.05274 | 0.02877 | 0.07672 |
| 0.42717 | 0.19640 | 0.11784 | 0.05892 | 0.05401 | 0.02946 | 0.07856 |
| 0.42562 | 0.19569 | 0.11741 | 0.05871 | 0.05381 | 0.02935 | 0.07827 |
| 0.42773 | 0.19666 | 0.11799 | 0.05900 | 0.05408 | 0.02950 | 0.07866 |
| 0.42810 | 0.19683 | 0.11810 | 0.05905 | 0.05413 | 0.02952 | 0.07873 |
| 0.43035 | 0.19786 | 0.11872 | 0.05936 | 0.05441 | 0.02968 | 0.07914 |
| 0.43223 | 0.19873 | 0.11924 | 0.05962 | 0.05465 | 0.02981 | 0.07949 |
| 0.42779 | 0.19668 | 0.11801 | 0.05900 | 0.05409 | 0.02950 | 0.07867 |
| 0.42590 | 0.19581 | 0.11749 | 0.05874 | 0.05385 | 0.02937 | 0.07833 |
| 0.42801 | 0.19679 | 0.11807 | 0.05904 | 0.05412 | 0.02952 | 0.07871 |
| 0.42527 | 0.19553 | 0.11732 | 0.05866 | 0.05377 | 0.02933 | 0.07821 |
| 0.42837 | 0.19695 | 0.11817 | 0.05909 | 0.05416 | 0.02954 | 0.07878 |
| 0.49453 | 0.22737 | 0.13642 | 0.06821 | 0.06253 | 0.03411 | 0.09095 |
| 0.49407 | 0.22716 | 0.13629 | 0.06815 | 0.06247 | 0.03407 | 0.09086 |
| 0.49419 | 0.22721 | 0.13633 | 0.06816 | 0.06248 | 0.03408 | 0.09089 |
| 0.49447 | 0.22734 | 0.13641 | 0.06820 | 0.06252 | 0.03410 | 0.09094 |
| 0.49376 | 0.22701 | 0.13621 | 0.06810 | 0.06243 | 0.03405 | 0.09081 |
| 0.49394 | 0.22710 | 0.13626 | 0.06813 | 0.06245 | 0.03407 | 0.09084 |
| 0.56410 | 0.25936 | 0.15561 | 0.07781 | 0.07132 | 0.03890 | 0.10374 |
| 0.56385 | 0.25924 | 0.15555 | 0.07777 | 0.07129 | 0.03889 | 0.10370 |
| 0.56398 | 0.25930 | 0.15558 | 0.07779 | 0.07131 | 0.03890 | 0.10372 |
| 0.56376 | 0.25920 | 0.15552 | 0.07776 | 0.07128 | 0.03888 | 0.10368 |
| 0.56323 | 0.25896 | 0.15537 | 0.07769 | 0.07121 | 0.03884 | 0.10358 |
| 0.56339 | 0.25903 | 0.15542 | 0.07771 | 0.07123 | 0.03885 | 0.10361 |
| 0.56401 | 0.25931 | 0.15559 | 0.07779 | 0.07131 | 0.03890 | 0.10373 |

|         |         |         |         |         |         |         |
|---------|---------|---------|---------|---------|---------|---------|
| 0.61055 | 0.28071 | 0.16843 | 0.08421 | 0.07720 | 0.04211 | 0.11229 |
| 0.61608 | 0.28325 | 0.16995 | 0.08498 | 0.07789 | 0.04249 | 0.11330 |
| 0.60974 | 0.28034 | 0.16820 | 0.08410 | 0.07709 | 0.04205 | 0.11214 |
| 0.59857 | 0.27521 | 0.16512 | 0.08256 | 0.07568 | 0.04128 | 0.11008 |
| 0.61142 | 0.28111 | 0.16867 | 0.08433 | 0.07731 | 0.04217 | 0.11244 |
| 0.61994 | 0.28503 | 0.17102 | 0.08551 | 0.07838 | 0.04275 | 0.11401 |
| 0.61198 | 0.28137 | 0.16882 | 0.08441 | 0.07738 | 0.04221 | 0.11255 |
| 0.09230 | 0.05581 | 0.02737 | 0.01234 | 0.01234 | 0.00644 | 0.01717 |
| 0.09103 | 0.05504 | 0.02699 | 0.01217 | 0.01217 | 0.00635 | 0.01694 |
| 0.09349 | 0.05653 | 0.02772 | 0.01250 | 0.01250 | 0.00652 | 0.01739 |
| 0.09153 | 0.05535 | 0.02714 | 0.01224 | 0.01224 | 0.00639 | 0.01703 |
| 0.10147 | 0.06136 | 0.03009 | 0.01357 | 0.01357 | 0.00708 | 0.01888 |
| 0.13934 | 0.08425 | 0.04132 | 0.01863 | 0.01863 | 0.00972 | 0.02592 |
| 0.12609 | 0.07624 | 0.03739 | 0.01686 | 0.01686 | 0.00880 | 0.02346 |
| 0.15102 | 0.09131 | 0.04478 | 0.02019 | 0.02019 | 0.01054 | 0.02810 |
| 0.15100 | 0.09130 | 0.04477 | 0.02019 | 0.02019 | 0.01054 | 0.02809 |
| 0.15122 | 0.09143 | 0.04484 | 0.02022 | 0.02022 | 0.01055 | 0.02813 |
| 0.15210 | 0.09197 | 0.04510 | 0.02034 | 0.02034 | 0.01061 | 0.02830 |
| 0.20812 | 0.12584 | 0.06171 | 0.02783 | 0.02783 | 0.01452 | 0.03872 |
| 0.20698 | 0.12515 | 0.06137 | 0.02768 | 0.02768 | 0.01444 | 0.03851 |
| 0.20404 | 0.12337 | 0.06050 | 0.02728 | 0.02728 | 0.01424 | 0.03796 |
| 0.20964 | 0.12676 | 0.06216 | 0.02803 | 0.02803 | 0.01463 | 0.03900 |
| 0.20691 | 0.12511 | 0.06135 | 0.02767 | 0.02767 | 0.01444 | 0.03849 |
| 0.20780 | 0.12565 | 0.06162 | 0.02779 | 0.02779 | 0.01450 | 0.03866 |
| 0.20675 | 0.12501 | 0.06130 | 0.02765 | 0.02765 | 0.01442 | 0.03847 |
| 0.20730 | 0.12534 | 0.06147 | 0.02772 | 0.02772 | 0.01446 | 0.03857 |
| 0.20595 | 0.12453 | 0.06107 | 0.02754 | 0.02754 | 0.01437 | 0.03832 |
| 0.26231 | 0.15860 | 0.07778 | 0.03508 | 0.03508 | 0.01830 | 0.04880 |
| 0.30556 | 0.18476 | 0.09060 | 0.04086 | 0.04086 | 0.02132 | 0.05685 |
| 0.30100 | 0.18200 | 0.08925 | 0.04025 | 0.04025 | 0.02100 | 0.05600 |
| 0.29834 | 0.18039 | 0.08846 | 0.03989 | 0.03989 | 0.02081 | 0.05551 |
| 0.30347 | 0.18349 | 0.08998 | 0.04058 | 0.04058 | 0.02117 | 0.05646 |
| 0.30100 | 0.18200 | 0.08925 | 0.04025 | 0.04025 | 0.02100 | 0.05600 |
| 0.29918 | 0.18090 | 0.08871 | 0.04001 | 0.04001 | 0.02087 | 0.05566 |
| 0.30249 | 0.18290 | 0.08969 | 0.04045 | 0.04045 | 0.02110 | 0.05628 |
| 0.30161 | 0.18237 | 0.08943 | 0.04033 | 0.04033 | 0.02104 | 0.05611 |
| 0.29687 | 0.17950 | 0.08802 | 0.03970 | 0.03970 | 0.02071 | 0.05523 |
| 0.40387 | 0.24420 | 0.11975 | 0.05401 | 0.05401 | 0.02818 | 0.07514 |
| 0.42276 | 0.25562 | 0.12535 | 0.05653 | 0.05653 | 0.02950 | 0.07865 |
| 0.42175 | 0.25501 | 0.12505 | 0.05640 | 0.05640 | 0.02942 | 0.07847 |
| 0.42332 | 0.25596 | 0.12552 | 0.05661 | 0.05661 | 0.02953 | 0.07876 |
| 0.42372 | 0.25620 | 0.12564 | 0.05666 | 0.05666 | 0.02956 | 0.07883 |
| 0.42592 | 0.25753 | 0.12629 | 0.05695 | 0.05695 | 0.02972 | 0.07924 |
| 0.37675 | 0.22780 | 0.11171 | 0.05038 | 0.05038 | 0.02628 | 0.07009 |
| 0.42324 | 0.25591 | 0.12550 | 0.05660 | 0.05660 | 0.02953 | 0.07874 |
| 0.37348 | 0.22582 | 0.11074 | 0.04994 | 0.04994 | 0.02606 | 0.06948 |
| 0.42340 | 0.25601 | 0.12554 | 0.05662 | 0.05662 | 0.02954 | 0.07877 |
| 0.42075 | 0.25441 | 0.12476 | 0.05626 | 0.05626 | 0.02935 | 0.07828 |

|         |         |         |         |         |         |         |
|---------|---------|---------|---------|---------|---------|---------|
| 0.42372 | 0.25620 | 0.12564 | 0.05666 | 0.05666 | 0.02956 | 0.07883 |
| 0.37675 | 0.22780 | 0.11171 | 0.05038 | 0.05038 | 0.02628 | 0.07009 |
| 0.37081 | 0.22421 | 0.10995 | 0.04958 | 0.04958 | 0.02587 | 0.06899 |
| 0.37250 | 0.22523 | 0.11045 | 0.04981 | 0.04981 | 0.02599 | 0.06930 |
| 0.37348 | 0.22582 | 0.11074 | 0.04994 | 0.04994 | 0.02606 | 0.06948 |
| 0.48885 | 0.29558 | 0.14495 | 0.06537 | 0.06537 | 0.03411 | 0.09095 |
| 0.48839 | 0.29530 | 0.14481 | 0.06531 | 0.06531 | 0.03407 | 0.09086 |
| 0.48851 | 0.29538 | 0.14485 | 0.06532 | 0.06532 | 0.03408 | 0.09089 |
| 0.48879 | 0.29555 | 0.14493 | 0.06536 | 0.06536 | 0.03410 | 0.09094 |
| 0.48808 | 0.29512 | 0.14472 | 0.06527 | 0.06527 | 0.03405 | 0.09081 |
| 0.48827 | 0.29523 | 0.14478 | 0.06529 | 0.06529 | 0.03407 | 0.09084 |
| 0.45863 | 0.27731 | 0.13599 | 0.06133 | 0.06133 | 0.03200 | 0.08533 |
| 0.42853 | 0.25911 | 0.12706 | 0.05730 | 0.05730 | 0.02990 | 0.07973 |
| 0.48839 | 0.29530 | 0.14481 | 0.06531 | 0.06531 | 0.03407 | 0.09086 |
| 0.48851 | 0.29538 | 0.14485 | 0.06532 | 0.06532 | 0.03408 | 0.09089 |
| 0.48879 | 0.29555 | 0.14493 | 0.06536 | 0.06536 | 0.03410 | 0.09094 |
| 0.50330 | 0.30432 | 0.14924 | 0.06730 | 0.06730 | 0.03511 | 0.09364 |
| 0.48885 | 0.29558 | 0.14495 | 0.06537 | 0.06537 | 0.03411 | 0.09095 |
| 0.57439 | 0.34730 | 0.17031 | 0.07681 | 0.07681 | 0.04007 | 0.10686 |
| 0.57451 | 0.34738 | 0.17035 | 0.07682 | 0.07682 | 0.04008 | 0.10689 |
| 0.57479 | 0.34755 | 0.17043 | 0.07686 | 0.07686 | 0.04010 | 0.10694 |
| 0.57408 | 0.34712 | 0.17022 | 0.07677 | 0.07677 | 0.04005 | 0.10681 |
| 0.55676 | 0.33664 | 0.16509 | 0.07445 | 0.07445 | 0.03884 | 0.10358 |
| 0.55691 | 0.33674 | 0.16513 | 0.07447 | 0.07447 | 0.03885 | 0.10361 |
| 0.55753 | 0.33711 | 0.16531 | 0.07455 | 0.07455 | 0.03890 | 0.10373 |
| 0.64328 | 0.38896 | 0.19074 | 0.08602 | 0.08602 | 0.04488 | 0.11968 |
| 0.64276 | 0.38864 | 0.19059 | 0.08595 | 0.08595 | 0.04484 | 0.11958 |
| 0.64291 | 0.38874 | 0.19063 | 0.08597 | 0.08597 | 0.04485 | 0.11961 |
| 0.64353 | 0.38911 | 0.19081 | 0.08605 | 0.08605 | 0.04490 | 0.11973 |
| 0.60965 | 0.36862 | 0.18077 | 0.08152 | 0.08152 | 0.04253 | 0.11342 |
| 0.70075 | 0.42371 | 0.20778 | 0.09370 | 0.09370 | 0.04889 | 0.13037 |
| 0.69652 | 0.42115 | 0.20653 | 0.09314 | 0.09314 | 0.04859 | 0.12959 |
| 0.69940 | 0.42289 | 0.20738 | 0.09352 | 0.09352 | 0.04880 | 0.13012 |
| 0.69095 | 0.41778 | 0.20487 | 0.09239 | 0.09239 | 0.04821 | 0.12855 |
| 0.09995 | 0.06585 | 0.02881 | 0.01352 | 0.01352 | 0.00706 | 0.01881 |
| 0.09631 | 0.06345 | 0.02776 | 0.01303 | 0.01303 | 0.00680 | 0.01813 |
| 0.09198 | 0.06060 | 0.02651 | 0.01244 | 0.01244 | 0.00649 | 0.01731 |
| 0.09852 | 0.06490 | 0.02840 | 0.01333 | 0.01333 | 0.00695 | 0.01854 |
| 0.09806 | 0.06460 | 0.02826 | 0.01327 | 0.01327 | 0.00692 | 0.01846 |
| 0.17557 | 0.11567 | 0.05060 | 0.02375 | 0.02375 | 0.01239 | 0.03305 |
| 0.17583 | 0.11584 | 0.05068 | 0.02379 | 0.02379 | 0.01241 | 0.03310 |
| 0.17634 | 0.11618 | 0.05083 | 0.02386 | 0.02386 | 0.01245 | 0.03319 |
| 0.17515 | 0.11539 | 0.05048 | 0.02370 | 0.02370 | 0.01236 | 0.03297 |
| 0.17922 | 0.11808 | 0.05166 | 0.02425 | 0.02425 | 0.01265 | 0.03374 |
| 0.15383 | 0.10134 | 0.04434 | 0.02081 | 0.02081 | 0.01086 | 0.02896 |
| 0.22906 | 0.15091 | 0.06602 | 0.03099 | 0.03099 | 0.01617 | 0.04312 |
| 0.23426 | 0.15434 | 0.06752 | 0.03169 | 0.03169 | 0.01654 | 0.04410 |
| 0.24275 | 0.15993 | 0.06997 | 0.03284 | 0.03284 | 0.01714 | 0.04569 |



|         |         |         |         |         |         |         |
|---------|---------|---------|---------|---------|---------|---------|
| 0.23446 | 0.15447 | 0.06758 | 0.03172 | 0.03172 | 0.01655 | 0.04413 |
| 0.23533 | 0.15504 | 0.06783 | 0.03184 | 0.03184 | 0.01661 | 0.04430 |
| 0.22855 | 0.15058 | 0.06588 | 0.03092 | 0.03092 | 0.01613 | 0.04302 |
| 0.24315 | 0.16019 | 0.07008 | 0.03290 | 0.03290 | 0.01716 | 0.04577 |
| 0.22969 | 0.15132 | 0.06620 | 0.03108 | 0.03108 | 0.01621 | 0.04324 |
| 0.23420 | 0.15430 | 0.06750 | 0.03169 | 0.03169 | 0.01653 | 0.04408 |
| 0.29487 | 0.19427 | 0.08499 | 0.03989 | 0.03989 | 0.02081 | 0.05551 |
| 0.30176 | 0.19881 | 0.08698 | 0.04083 | 0.04083 | 0.02130 | 0.05680 |
| 0.35316 | 0.23267 | 0.10179 | 0.04778 | 0.04778 | 0.02493 | 0.06648 |
| 0.29871 | 0.19680 | 0.08610 | 0.04041 | 0.04041 | 0.02109 | 0.05623 |
| 0.30201 | 0.19897 | 0.08705 | 0.04086 | 0.04086 | 0.02132 | 0.05685 |
| 0.29932 | 0.19720 | 0.08628 | 0.04050 | 0.04050 | 0.02113 | 0.05634 |
| 0.29995 | 0.19761 | 0.08646 | 0.04058 | 0.04058 | 0.02117 | 0.05646 |
| 0.30547 | 0.20125 | 0.08805 | 0.04133 | 0.04133 | 0.02156 | 0.05750 |
| 0.29949 | 0.19731 | 0.08632 | 0.04052 | 0.04052 | 0.02114 | 0.05637 |
| 0.39918 | 0.26299 | 0.11506 | 0.05401 | 0.05401 | 0.02818 | 0.07514 |
| 0.41785 | 0.27529 | 0.12044 | 0.05653 | 0.05653 | 0.02950 | 0.07865 |
| 0.41685 | 0.27463 | 0.12015 | 0.05640 | 0.05640 | 0.02942 | 0.07847 |
| 0.41840 | 0.27565 | 0.12060 | 0.05661 | 0.05661 | 0.02953 | 0.07876 |
| 0.41880 | 0.27591 | 0.12071 | 0.05666 | 0.05666 | 0.02956 | 0.07883 |
| 0.42097 | 0.27734 | 0.12134 | 0.05695 | 0.05695 | 0.02972 | 0.07924 |
| 0.42250 | 0.27836 | 0.12178 | 0.05716 | 0.05716 | 0.02982 | 0.07953 |
| 0.41832 | 0.27560 | 0.12058 | 0.05660 | 0.05660 | 0.02953 | 0.07874 |
| 0.41658 | 0.27445 | 0.12007 | 0.05636 | 0.05636 | 0.02941 | 0.07841 |
| 0.41848 | 0.27570 | 0.12062 | 0.05662 | 0.05662 | 0.02954 | 0.07877 |
| 0.41586 | 0.27398 | 0.11986 | 0.05626 | 0.05626 | 0.02935 | 0.07828 |
| 0.41879 | 0.27591 | 0.12071 | 0.05666 | 0.05666 | 0.02956 | 0.07883 |
| 0.37237 | 0.24532 | 0.10733 | 0.05038 | 0.05038 | 0.02628 | 0.07009 |
| 0.36650 | 0.24146 | 0.10564 | 0.04958 | 0.04958 | 0.02587 | 0.06899 |
| 0.36817 | 0.24256 | 0.10612 | 0.04981 | 0.04981 | 0.02599 | 0.06930 |
| 0.36914 | 0.24320 | 0.10640 | 0.04994 | 0.04994 | 0.02606 | 0.06948 |
| 0.37133 | 0.24464 | 0.10703 | 0.05024 | 0.05024 | 0.02621 | 0.06990 |
| 0.45867 | 0.30218 | 0.13220 | 0.06205 | 0.06205 | 0.03238 | 0.08634 |
| 0.45888 | 0.30232 | 0.13227 | 0.06208 | 0.06208 | 0.03239 | 0.08638 |
| 0.45504 | 0.29979 | 0.13116 | 0.06156 | 0.06156 | 0.03212 | 0.08565 |
| 0.46405 | 0.30573 | 0.13376 | 0.06278 | 0.06278 | 0.03276 | 0.08735 |
| 0.44875 | 0.29564 | 0.12934 | 0.06071 | 0.06071 | 0.03168 | 0.08447 |
| 0.45127 | 0.29730 | 0.13007 | 0.06105 | 0.06105 | 0.03185 | 0.08494 |
| 0.44722 | 0.29464 | 0.12891 | 0.06051 | 0.06051 | 0.03157 | 0.08418 |
| 0.42354 | 0.27904 | 0.12208 | 0.05730 | 0.05730 | 0.02990 | 0.07973 |
| 0.45605 | 0.30046 | 0.13145 | 0.06170 | 0.06170 | 0.03219 | 0.08584 |
| 0.44768 | 0.29494 | 0.12904 | 0.06057 | 0.06057 | 0.03160 | 0.08427 |
| 0.46587 | 0.30693 | 0.13428 | 0.06303 | 0.06303 | 0.03289 | 0.08769 |
| 0.44835 | 0.29538 | 0.12923 | 0.06066 | 0.06066 | 0.03165 | 0.08439 |
| 0.45380 | 0.29898 | 0.13080 | 0.06140 | 0.06140 | 0.03203 | 0.08542 |
| 0.51838 | 0.34152 | 0.14942 | 0.07013 | 0.07013 | 0.03659 | 0.09758 |
| 0.51951 | 0.34227 | 0.14974 | 0.07029 | 0.07029 | 0.03667 | 0.09779 |
| 0.51749 | 0.34094 | 0.14916 | 0.07001 | 0.07001 | 0.03653 | 0.09741 |

|         |         |         |         |         |         |         |
|---------|---------|---------|---------|---------|---------|---------|
| 0.53474 | 0.35230 | 0.15413 | 0.07235 | 0.07235 | 0.03775 | 0.10066 |
| 0.54181 | 0.35696 | 0.15617 | 0.07330 | 0.07330 | 0.03825 | 0.10199 |
| 0.54035 | 0.35600 | 0.15575 | 0.07311 | 0.07311 | 0.03814 | 0.10171 |
| 0.54194 | 0.35704 | 0.15621 | 0.07332 | 0.07332 | 0.03825 | 0.10201 |
| 0.55080 | 0.36288 | 0.15876 | 0.07452 | 0.07452 | 0.03888 | 0.10368 |
| 0.61889 | 0.40774 | 0.17838 | 0.08373 | 0.08373 | 0.04369 | 0.11650 |
| 0.62552 | 0.41211 | 0.18030 | 0.08463 | 0.08463 | 0.04415 | 0.11775 |
| 0.62333 | 0.41066 | 0.17967 | 0.08433 | 0.08433 | 0.04400 | 0.11733 |
| 0.60381 | 0.39780 | 0.17404 | 0.08169 | 0.08169 | 0.04262 | 0.11366 |
| 0.69472 | 0.45770 | 0.20024 | 0.09399 | 0.09399 | 0.04904 | 0.13077 |
| 0.73598 | 0.48488 | 0.21214 | 0.09957 | 0.09957 | 0.05195 | 0.13854 |
| 0.69430 | 0.45742 | 0.20012 | 0.09393 | 0.09393 | 0.04901 | 0.13069 |
| 0.69702 | 0.45921 | 0.20091 | 0.09430 | 0.09430 | 0.04920 | 0.13120 |
